## **Multiple omic investigations of freeze tolerance adaptation in the aquatic ectothermic vertebrate, the Amur sleeper**

Wenqi Lv<sup>1,5,†</sup>, Haifeng Jiang<sup>2,†</sup>, Yuting Qian<sup>1,5</sup>, Minghui Meng<sup>6</sup>, Cheng Wang<sup>1,5</sup>, Ning Sun<sup>1,5</sup>, Yongrui Lu<sup>1,5</sup>, Houhua Bing<sup>1,5</sup>, Chengchi Fang<sup>1</sup>, David M. Irwin<sup>8,9</sup>, Shunping He<sup>1,3,7,\*</sup>, Liandong Yang<sup>1,3,4,\*</sup>

<sup>1</sup> The Key Laboratory of Aquatic Biodiversity and Conservation of Chinese Academy of Sciences, Institute of Hydrobiology, Chinese Academy of Sciences, Wuhan 430072, China

<sup>2</sup> College of Animal Science and Technology, Northwest A&F University, Yangling, Shaanxi 712100, China

<sup>3</sup> Academy of Plateau Science and Sustainability, Qinghai Normal University, Xining 810016, P. R. China

<sup>4</sup> State Key Laboratory of Genetic Resources and Evolution, Kunming Institute of Zoology, Chinese Academy of Sciences

<sup>5</sup> University of Chinese Academy of Sciences, Beijing 100049, China

<sup>6</sup> Diggers (Wuhan) Biotechnology Co., Ltd, Wuhan 430000, China

<sup>7</sup> Center for Excellence in Animal Evolution and Genetics, Chinese Academy of Sciences, Kunming 650223, China

<sup>8</sup> Department of Laboratory Medicine and Pathobiology, University of Toronto, Toronto M5S1A8, Canada

<sup>9</sup> Banting and Best Diabetes Centre, University of Toronto, Toronto M5S1A8, Canada

† These authors contributed equally to this work.

\* Corresponding author: E-mail address: [clad@ihb.ac.cn](mailto:clad@ihb.ac.cn) (S. He); [yangliandong1987@163.com](mailto:yangliandong1987@163.com) (L. Yang);

Tel.: +86-27-68780430 (L. Yang); Institute of Hydrobiology, Chinese Academy of Sciences, 7<sup>th</sup> Donghu South Road, Wuhan 430072, China

1 **Abstract**

2 Freeze tolerance is an amazing overwintering strategy that enables ectotherms to occupy new  
3 niches and survive in cold climates. However, the genetic basis underpinning this ecologically  
4 relevant adaptation is largely unknown. Amur sleeper is the only known freeze-tolerant fish species  
5 that can overwinter with its entire body frozen in ice. Here, we sequenced the chromosome-level  
6 genome of the Amur sleeper and performed comparative genomic, transcriptomic, and metabolomic  
7 analyses to investigate this remarkable adaptation. Phylogenetic analyses showed that the Amur  
8 sleeper diverged from its close relative with no cold hardiness about 15.07 million years ago and  
9 revealed two unusual population expansions during the glacial epochs. Integrative omics data  
10 identified a synchronous regulation of genes and metabolites involved in hypometabolism and  
11 cellular stress response, and several related genes showed strong evidence of accelerated evolution  
12 and positive selection. Potential evolutionary innovations that might aid in freezing survival were  
13 found to be associated with the dynamic rearrangement of the cytoskeleton to maintain cell viability,  
14 redistribution of water and cryoprotectants to limit cell volume reduction, and inhibition in nerve  
15 activity to facilitate dormancy, demonstrating a coordinated evolution for this complex adaptation.  
16 Overall, our work provides valuable resources and opportunities to unveil the genetic basis of freeze  
17 tolerance adaptation in ectothermic vertebrates.

18 **Key words:** freeze tolerance, Amur sleeper, hypometabolism, cell stress response, cytoskeleton,  
19 cryoprotectant, nerve transmission

## 1 Introduction

2 Freeze tolerance, the ability of an organism to withstand whole body freezing, is a striking  
3 winter survival strategy adapted by many ectotherms living in seasonally cold climates (Schmid  
4 1982; Storey and Storey 1996b). At sub-zero temperatures, freeze-tolerant animals can withstand  
5 the conversion of as much as ~ 82% of their total body water into extracellular ice (Ramlov and  
6 Westh 1993). These animals may spend a prolonged state of frozen dormancy (days to months) in  
7 their hibernation states with the cessation of vital physiological functions including heartbeat,  
8 respiration, nerve conductance, and skeletal muscle movement, and return to active lives after  
9 thawing in the warm spring (Storey 1987, 1990). Although freeze tolerance has evolved multiple  
10 times across the animal kingdom ranging from insects, invertebrates, reptiles, and amphibians  
11 (Costanzo and Claussen 1990; Hans, et al. 1992; Loomis 1995; Layne Jr and Kefauver 1997;  
12 Bradley Shaffer, et al. 2013), it is actually a minority choice among vertebrates compared with  
13 common overwintering strategies like migration, hibernation and freeze avoidance (Costanzo and  
14 Lee 2013; Iwaya-Inoue, et al. 2018; Mohr, et al. 2020).

15 Most natural freeze tolerance refers to ice formation in extracellular spaces while resisting  
16 intercellular freezing to avoid damage of subcellular compartments and the cytoskeleton (Costanzo  
17 and Lee 2013; Storey and Storey 2017). Ice crystals exclude solutes greatly elevates the osmolality  
18 of extracellular fluids, producing a hyperosmotic stress that draws water out of cells causing them  
19 to shrink (Storey and Storey 2020). Besides physical and osmotic damage, freezing causes important  
20 consequences including hypoxia/anoxia, ischemia, dehydration and hypometabolism etc (Storey  
21 and Storey 2017; Toxopeus and Sinclair 2018). Moreover, reoxygenation, rehydration and  
22 reperfusion during thawing also accompany severe stresses (Giraud-Billoud, et al. 2019). To date,  
23 a suite of complex coordinated cellular, molecular, and physiological adaptations that confer  
24 freezing survival has been extensively and well explored in multiple hibernating reptile and  
25 amphibian species, especially the wood frogs (Zhang and Storey 2012; Bradley Shaffer, et al. 2013;  
26 Storey and Storey 2013, 2017; Costanzo 2019). These adaptations include mechanisms to manage  
27 extracellular ice volume and growth rate, strong metabolic rate depression coupling with selective  
28 activation of “survival” pathways to maintain stability, and accumulation of low-molecular-weight  
29 organic compounds as cryoprotectants. However, hitherto, the genetic basis of freeze tolerance in  
30 ectothermic vertebrates remains largely unknown.

31 The Amur sleeper, *Percottus glenni* (Odontobutidae, Perciformes), is an aquatic species that  
32 can overwinter with its entire body frozen in ice, and probably the only freeze-tolerant vertebrate  
33 aside from reptiles and amphibians (Chai, et al. 2020). It is a limnophilic species native to the Amur  
34 River drainage in northeastern Asia, and has invaded European waters, leading to detrimental  
35 ecological impacts (Reshetnikov and Ficetola 2011; Xu, et al. 2014). Amur sleeper prefers small,  
36 stagnant waterbodies, which commonly freeze to the bottom in the winter. Before freezing, the  
37 Amur sleeper experiences long-term hypoxic or anoxic conditions in ice-covered waters until its  
38 whole body is encapsulated in ice (Reshetnikov 2003; Karanova 2009). Frozen dormancy can be  
39 maintained for up to three months (typically December to March), with revival occurring within a  
40 few hours of thawing (Chai, et al. 2020). This ecologically relevant freeze tolerance provides the  
41 Amur sleeper with a competitive advantage over other freshwater fishes that are unable to survive  
42 in such an extreme environment (yielding an avoidance of competitors and predators), allowing it  
43 to become one of the most widespread and successful fish invaders (Reshetnikov and Ficetola 2011).  
44 Therefore, the Amur sleeper could serve as a new model for investigations of adaptive freeze

45 tolerance in ectothermic vertebrates, for which the majority of our knowledge comes from research  
46 in a few terrestrial amphibians. Moreover, the Amur sleeper has a small genome size and simple  
47 evolutionary history, thus providing an ideal opportunity to study the genetic basis of freeze  
48 tolerance in ectothermic vertebrates.

49 In this study, we generated a high-quality chromosome-level genome for Amur sleeper and a  
50 de novo reference genome assembly for *Neodontobutis hainanensis*, the closest relative to *P. glenii*  
51 with no cold hardiness (Lv, et al. 2020). First, we conducted comparative genomic analyses to  
52 explore the population histories and genetic changes of the Amur sleeper. Then we combined  
53 transcriptomic, and metabolomic analyses to better understand the molecular adaptations  
54 accompanying freeze tolerance. Our results not only gain insights into the genetic basis of this  
55 remarkable adaptation, but also provide useful genetic resources for future study.

56

## 57 **Results and discussion**

### 58 **Genome Characteristics**

59 We generated the first chromosome-level genome assembly for *P. glenii* using a combination  
60 of Nanopore long reads, BGISEQ-500 reads and Hi-C data (supplementary table S1). The genome  
61 size of *P. glenii* was estimated to be 827.25 Mb with a heterozygous ratio of 0.65% (supplementary  
62 fig. S1, supplementary table S2). Three assembly algorithms were used, and with the genome  
63 assembled by SmartDenovo finally selected based on continuity (supplementary table S3). After the  
64 removal of sequence redundancy, the genome size of the assembly was 710.22 Mb with contig N50  
65 of 5.49 Mb (supplementary table S3). Further, we anchored and oriented 702 contigs (689.63Mb,  
66 ~97.09%) into 22 chromosomes (fig. 1A, supplementary fig. S2, supplementary table S4). Finally,  
67 a chromosome-level genome with contig and scaffold N50 equal to 2.96 Mb and 29.56 Mb,  
68 respectively, was generated (supplementary table S5). Over 99% of the short reads could be mapped  
69 to the genome, which covering 98.61% of the *P. glenii* genome assembly (supplementary table S6).  
70 Evaluation of the completeness based on BUSCO identified 91.2% complete and 3.3% fragmented  
71 genes (supplementary table S7). For comparative analyses, a de novo assembly of the *N. hainanensis*  
72 genome was performed and an individual with heterozygous ratio of 0.15% yielded a ~848 Mb  
73 assembly containing 8.221 contigs with the N50 of 1.34 Mb (supplementary table S5). A total of  
74 97.21% short reads were mapped to the *N. hainanensis* assembly (supplementary table S6), and  
75 93.10% complete BUSCO genes captured (supplementary table S7). The higher heterozygous rate  
76 in *P. glenii* may suggest an admixture of different clades during the its northwards expansion, and  
77 results in a reduction of genome size compared to *N. hainanensis* due to the removal of sequence  
78 redundancy.

79 The GC content were 39.80% and 39.38 % for the *P. glenii* and *N. hainanensis* genome,  
80 respectively (fig. 1A, supplementary table S5). Approximately 48.13% and 45.99% of bases were  
81 identified as repetitive sequences in the two genomes by combining de novo and homology-based  
82 prediction methods (supplementary table S8). We predicted a total of 23,582 and 26,237 protein-  
83 coding genes in *P. glenii* and *N. hainanensis*, respectively, and approximately 97.45% of the protein-  
84 coding genes in *P. glenii* and 94.63% of those in *N. hainanensis* were successfully annotated using  
85 five public databases (supplementary table S9). We also compared the *P. glenii* genome karyotype  
86 with the genome of *O. potamophila*, a representative species also from Odontobutidae family. Only  
87 two chromosomal fission and fusion events were detected, indicating a conserved chromosomal  
88 evolution after divergence of the two species (fig. 1B). Taken together, these results revealed high-

89 quality assembly and accuracy of annotation for the *P. glenii* and *N. hainanensis* genomes, which  
90 can be important genetic resources for further comparative and functional studies of freeze tolerance  
91 in ectotherms.

92

### 93 **Population history and Evolutionary rate**

94 Phylogenetic analysis based on a set of 4,550 one-to-one orthologs from ten teleosts indicated  
95 that *P. glenii* was closest to *N. hainanensis* and form a monophyletic sister group to *Odontobutis*  
96 (fig. 1C and supplementary fig. S3). The reconstructed topology is consistent with topologies  
97 inferred by the mitochondrial genome and nuclear coding genes (Li, et al. 2018; Lv, et al. 2020).  
98 The divergence time between *P. glenii* and *N. hainanensis* in the present study was estimated at  
99 15.07 Ma (7.94–23.02 Ma, 95% HPDs) in min-Miocene (fig. 1C).

100 Analysis using pairwise sequentially Markovian coalescent (PSMC) model (Li and Durbin  
101 2011) revealed quite distinct demographic patterns for the two species (fig. 1D), which could be  
102 related to the significant climate oscillations involving glacial-interglacial cycles and sea level  
103 changes. Interestingly, two events of unusual population expansions were detected in the  
104 demographic history of Amur sleeper. The first expansion occurred before ~3 Ma and reached a  
105 peak ~0.3 Ma at the largest Quaternary glaciation (0.80–0.20 Ma) in the late Pleistocene, indicating  
106 that Amur sleeper has already developed a mechanism of cold adaptation at the Pliocene glaciation.  
107 This expansion corroborates well with a previous study that the Amur sleeper may have spread from  
108 the warm south to the cold north during Late Pliocene (2.58–3.60 Ma) (Li, et al. 2018). The  
109 subsequent declines coincided with the advent of the warm interglacial period, during which the rise  
110 in sea level caused by deglaciation resulted a dramatic reduction in freshwater habitats. Similarly,  
111 the second expansion occurred at ~70 Ka and reached a peak at the last glacial maximum (LGM,  
112 26.5–19.0 ka, (Clark, et al. 2009)). In contrast, the population size of *N. hainanensis* dropped sharply  
113 since ~0.9 Ma and the only expansion occurred at ~0.15 Ma, followed by sharp declines predating  
114 the LGM. Overall, Amur sleeper maintains a relatively stable effective population size and has rich  
115 genetic diversity than *N. hainanensis*. This may be attributed to its strong resistance and adaptability,  
116 which can aid survival in extreme environments, thereby providing opportunities to expand into  
117 new ecological niches.

118 The development of freeze tolerance suggests adaptive evolution in the Amur sleeper, thus, we  
119 calculated its mutated and evolutionary rates. The mutation rate across the whole genome for the  
120 Amur sleeper is comparable to that of the other closely relative species (fig. 1E), however, our  
121 analyses revealed a higher evolutionary rate in the Amur sleeper, implying possible changes in the  
122 selection pressure experienced by *P. glenii* (fig. 1F, supplementary fig. S4).

123

### 124 **Transcriptomic and metabolic profiles over freeze/thaw**

125 To understand the genetic regulatory mechanisms and metabolic adaptations, the transcriptome  
126 of the brain, liver, and muscle tissues and metabolomes of the liver and muscle tissues from three  
127 periods in a freeze/thaw episode, i.e., active autumn (AC), winter freezing (FR) (fig. 2A,  
128 supplementary movie S1), and early spring recovery (RE) (fig. 2B, supplementary movie S2), were  
129 analyzed for the Amur sleeper. Principal component analyses (PCA) of the transcriptomes showed  
130 that there were clear variations among the brain and liver tissues at different periods (supplementary  
131 fig. S5A). PCA analyses of the metabolomes showed large variations between the AC and FR and  
132 the AC and RE, while smaller differences between the FR and RE (supplementary fig. S5B). The

133 number of differentially expressed genes (DEGs) and significantly different metabolites (SDMs) for  
134 the two comparisons i.e., AC vs FR and AC vs RE, were obviously more than those of FR vs RE  
135 (supplementary fig. S6A and B), indicating substantial changes in transcriptional and metabolomic  
136 profiles during the freezing and thawing periods. To better understand the potential functions of the  
137 regulation, GO and KEGG analyses of DEGs and SDMs were performed. Moreover, we further  
138 combined the results with comparative genomic analyses in order to provide clear insight into the  
139 genetic evolution and adaptive mechanisms of Amur sleeper's freezing survival.

140

#### 141 **Changes in genes and metabolites related to metabolic characteristics**

142 Stress-induced metabolic rate depression (MRD) is the core adaptive strategy implemented by  
143 freeze tolerant animals to greatly decrease organismal energy demands, thereby permitting long-  
144 term survival using only their body fuel reserves (Carey, et al. 2003; Storey and Storey 2013). Here,  
145 transcriptomic profiles identified a set of 534 genes had significant changes in expression for all  
146 three tissues of Amur sleeper at FR (supplementary fig. 6A), among which, the downregulated genes  
147 were significantly enriched in the GO functional categories related to mitochondria (e.g.,  
148 mitochondrial part, mitochondrion, and mitochondrial protein complex) (fig. 2C). The mitochondria  
149 produce most of the adenosine triphosphate (ATP) used by cells through mitochondrial energy  
150 metabolism, oxidative phosphorylation and tricarboxylic acid cycle reactions (Wu, et al. 2007).  
151 Importantly, *nadufaf6* and *atp5f1d*, which as components of the mitochondrial respiratory chain,  
152 were detected as positively selected genes (PSGs) (fig. 2F) in Amur sleeper. The observed signal of  
153 positive selection may have implications for regulating ATP synthesis. KEGG analysis revealed that  
154 down-regulated genes during FR in the brain and muscle tissue were significantly enriched in the  
155 oxidative phosphorylation pathway (fig. 2F, supplementary fig. S7A and C). Simultaneously, we  
156 found that malonic acid, an inhibitor of the tricarboxylic acid cycle by affecting succinate  
157 dehydrogenase (Lu, et al. 2018), increased about 3.28-fold and 6.34-fold in liver and muscle tissues  
158 during FR, respectively (fig. 2D and E, supplementary fig. S8A and B). Thus, the suppression of  
159 multiple mitochondrial pathways suggests a dramatic reduction in metabolic rate in the Amur  
160 sleeper during freezing. In addition, it is noteworthy that mitochondria are also the main cellular  
161 reactive oxygen species (ROS) generator, the inhibition would lead to a lower risk of ROS damage  
162 to macromolecules and organelles, including proteins, DNA, mitochondria, and cytoskeleton (Ou,  
163 et al. 2018).

164 The down-regulated genes were also enriched in pathways related to transcription, translation,  
165 and cell division (fig. 2F, supplementary Fig. S7A), which are all considered to be energy-expensive  
166 cell processes. Studies on wood frogs and western painted turtle demonstrated that cell cycle  
167 suppression is a general feature of freeze tolerance (Zhang and Storey 2012; Bradley Shaffer, et al.  
168 2013). Remarkably, the *ccnd2* gene encodes G1/S specific cyclin D2 was positively selected in  
169 Amur sleeper and showed decreased expression at FR (fig. 2F). Inhibition of *ccnd2* expression could  
170 arrest the cell cycle in G1 phase (Xiao, et al. 2021). *Gadd45gip1* and *hdac9* were identified as  
171 rapidly evolved genes (REGs), of which activity have been reported to be associated with cell cycle  
172 G1/S transition (Li and Durbin 2011). Moreover, we found a number of negative regulators of  
173 mTORC1 including *deptor*, *ddit4*, *tsc1* and *akt1* (Coronel, et al. 2022) significantly up-regulated at  
174 FR (supplementary fig. S9), indicating a strong depression of mTORC1 activity. Studies have  
175 reported that a reduction of mTORC1 activity could lead to subsequent inhibition of protein  
176 translation and cell cycle in hibernation animals (Logan, et al. 2019; Dias, et al. 2021). Furthermore,

177 *nprl3* and *ikkb* from mTOR signaling pathways were identified as PSG and REG, respectively (fig.  
178 2F). *Nprl3* is a component of GATOR1, a complex involved in the inhibition of the mTORC1  
179 (Baldassari, et al. 2016). *Ikkb* can activates the mTOR by mediating suppression of TSC1, a  
180 repressor of the mTOR pathway (Lee, et al. 2007). These genes that undergone marked genetic  
181 alterations may participate in the suppression of energy-expensive cell process in Amur sleeper  
182 during freezing, although their function still await further verification. Collectively, our results  
183 support a global MRD in Amur sleeper during frozen dormancy, which involves not only minimum  
184 energetic needs but also cellular defense strategy.

185

### 186 **Changes in genes and metabolites associated with cell preservation strategies**

187 Both of freezing and thawing expose cells and organs to severe physiological stresses including  
188 anoxia/reoxygenation, dehydration/rehydration, ischemia/reperfusion, physical damage by ice and  
189 increased oxidative stress (Storey and Storey 2017; Zhang, et al. 2021). Therefore, an integrated  
190 suite of cellular stress response (CSR) to deal with these challenges is of paramount important to  
191 freeze-tolerant species. Core elements that constituted in the CSR including antioxidant defense,  
192 protein stabilization by chaperones, DNA damage repair, and so on (Kültz 2005). In metabolomic  
193 analysis, Vitamin C (Vc), as a well-known antioxidant was significantly increased 150.2-fold and  
194 66.9-fold in the liver tissue during FR and RE, respectively, but only increased 8.7-fold and 2.5-fold  
195 respectively in the muscle tissue. Other vitamins, Vb3 and Vb6 have also shown antioxidant  
196 potential (Sinbad, et al. 2019), and showed consistent elevation at the two periods (fig. 2D and E,  
197 supplementary fig. S10 and11). Hypotaurine, which was evidenced as a strong antioxidant (Aruoma,  
198 et al. 1988), rose significantly in liver tissue at the FR (19.7-fold) and RE (29.7-fold), respectively,  
199 also with a slight increase in muscle tissue (3.0-fold and 3.22-fold, respectively) (fig. 2D and E,  
200 supplementary fig. S10 and11). Meanwhile, metabolites that can serve as markers of oxidative stress,  
201 such as glutathione oxidized (GSSG), hypoxanthine and 8-hydroxyguanosine (8-OHG) (Joanisse  
202 and Storey 1996; Hira, et al. 2014) showed notable increases in muscle tissue during FR and RE  
203 (fig. 2E, supplementary fig. S10). However, liver tissue had lower levels of 8-OHG and total lipid  
204 peroxidation (LPO) in these two periods, in agreement with its higher antioxidants amount (fig. 2D,  
205 supplementary fig. S11). Synchronously, our transcriptome profiles also identified a set of up-  
206 regulation genes that play crucial antioxidant roles during FR and RE. For example, the core  
207 antioxidant enzyme, superoxide dismutase (*sod1*, *sod3*), showed obviously higher expression levels  
208 in all three tissues, and glutathione peroxidases (*gpx1*, *gpx4*, and *gpx6*) were up-regulated in liver  
209 and muscle tissues. Other enzymes or proteins that have crucial antioxidant capacity, such as  
210 glutathione S-transferase (GST) isozymes (*gstm3*, *mgst3*) and ferritin (*fh1*) were also significantly  
211 increased (fig. 2F) (Tsuji, et al. 2000).

212 Heat shock proteins (HSPs) are the best-known chaperones that promote the refolding of  
213 denatured or misfolded proteins and prevent denaturation and aggregation of unfolded protein (King  
214 and MacRae 2015). Transcriptomic profiles revealed that the expression levels of number of HSP  
215 genes (including *hspb8*, *hsp70-1*, *hspa13*, *hsp70*, *hspa12a*, *hspb1*, *hspa8*, *hspa14*, *hspb11*, and  
216 *hsp90a*) significantly elevated especially in muscle during FR and RE (fig. 2F). Thus, the specific  
217 upregulated HSPs particular in muscle of Amur sleeper would contribute to stabilizing cellular  
218 proteome upon freeze/thaw. Moreover, genes involved in DNA damage repair, i.e., *ercc6*, *pms2*, and  
219 *gadd45b*, were also up-regulated during FR. Notably, some genes (*shc1*, *oxr1*, *hspa12b*, *ercc8* and  
220 *ercc6l2*) associated with CRS were found to be underwent positive selection and rapid evolution

221 (fig. 2F). *Shc1* and *oxr1* has been reported to be important in protection from oxidative stress (Koch,  
222 et al. 2008; Sanada, et al. 2014). *Ercc8* and *ercc612* are essential factor in the transcription-coupled  
223 repair (TCR) pathway for DNA excision repair (Fousteri and Mullenders 2008; Tummala, et al.  
224 2018). Overall, the synchronous regulation at transcriptional and metabolic levels and genetic  
225 changes provides strong evidence for the involvement of multiple cell preservation strategies, which  
226 would make important contributions to avoid metabolic damage and maintain cellular homeostasis  
227 in freeze tolerant species over freeze/thaw.

228

### 229 **Gene changes correlated with the cytoskeleton**

230 The cytoskeleton consists of actin filaments (MF), microtubules (MT), and intermediate  
231 filaments (IF), not only helps control cell shape, bear external forces, and maintain the stability of  
232 internal cell structures, but also enables cells to carry out essential functions such as division and  
233 movement (Alberts, et al. 2002; Fletcher and Mullins 2010). During freezing, direct physical stress  
234 by extracellular ice and great changes in cell volume accompany freeze/thaw as well as destructive  
235 ROS would place significant consequences to the cytoskeleton. Importantly, multimeric cytoskeletal  
236 components quickly depolymerize at near-freezing temperatures, resulting in catastrophic  
237 functional impairment (Des Marteaux, et al. 2018; Ou, et al. 2018). Therefore, adaptive  
238 modifications of cytoskeletal related genes to cope with the challenges of cytoskeleton damage were  
239 likely necessary. As expected, our genomic comparisons of the Amur sleeper against other teleost  
240 revealed 230 gene families that had expanded significantly in size, and these families exhibited  
241 significant enrichments in functions associated with the cytoskeleton (e.g., cytoskeletal part,  
242 cytoskeleton organization, and microtubule-based process) (fig. 3A). Notably, three expanded gene  
243 families (*kntc2*, *spc24* and *haus3*) were related to kinetochore–microtubule attachment, a critical  
244 requirement for mitosis (fig. 3A, supplementary fig. S12). The *kntc2* and *spc24* gene families encode  
245 components of the NDC80 complex that is essential for stable kinetochore-microtubule anchoring  
246 and regulation of microtubules at the kinetochore (Umbreit, et al. 2012). *Haus3*, a component of the  
247 HAU augmin-like complex, has been reported to regulate the expression of the centrosome-related  
248 protein  $\alpha$ -tubulin and the spindle-related protein  $\gamma$ -tubulin (Zhang, et al. 2019).

249 Consistently, KEGG pathway enrichment analyses of REGs showed mostly significant  
250 enrichment in regulation of actin cytoskeleton and focal adhesin (supplementary fig. S13). Of  
251 particular interest, five chaperones *cct $\theta$* , *cct $\zeta$* , *ccte*, *tbcA*, and *tbcD*, exhibit significant evidence for  
252 elevated rates of evolution (fig. 3B). The genes *cct $\theta$* , *cct $\zeta$*  and *ccte* encode different subunits of  
253 chaperonin-containing t-complex polypeptide 1 (CCT complex) (Leitner, et al. 2012) are essential  
254 in the biogenesis of actin and tubulin to assemble MF and MT (Llorca, et al. 2001). Moreover, *tbcA*  
255 and *tbcD* are tubulin-specific chaperones (TBCs) that bring together  $\alpha$ - and  $\beta$ -tubulin subunits to  
256 form the assembly-competent heterodimer, which is required in the biogenesis of tubulin. *Tbcd* was  
257 further identified to be under positive selection, and showed four positively selected sites with one  
258 located in the TFCD-C domain (fig. 3C). Moreover, tubulin polymerization-promoting protein  
259 (*tppp*), a microtubule regulatory protein (Hlavanda, et al. 2002), was also identified as a PSG with  
260 a mutation (G174E) in p25-alpha domain (fig. 3C). *Tppp* not only promotes the incorporation of  
261 tubulin heterodimers into growing microtubule filaments (Hlavanda, et al. 2002), but also increases  
262 the level of microtubule acetylation, which is responsible for the stabilization of MT by inhibiting  
263 the activity of histone deacetylase 6 (Tökési, et al. 2010). The genes display accelerated evolution  
264 in the Amur sleeper are pivotal in cytoskeleton stability, especially tubulin biogenesis, indicating a



265 co-opted from cytoskeletal system to prevent irreparable structural damage and maintain normal  
266 function over freeze/thaw.

267 Our transcriptomic analyses lend further support to a dynamic cytoskeletal regulation in the  
268 Amur sleeper. Multiple genes involved in three components of the cytoskeleton exhibited significant  
269 expression fluctuations over FR and RE, especially in muscle tissue (fig. 3D). We observed  
270 significant upregulation of genes encoding subunits of CCT complex (*cctβ*, *cctδ*, *cctζ*, *cctθ*, and *cctε*)  
271 during the FR and RE stages (fig. 3D), suggesting the potential reassembly of dissociated  
272 cytoskeletal monomers. Indeed, the upregulation of the CCT complex involved in prevention of  
273 cold-induced actin depolymerization was also found in two insect species (Kayukawa and Ishikawa  
274 2009; Zhang, et al. 2011). For microtubules, the genes *tubb1*, *tubb4b*, and *tubb2b* encoding β-tubulin,  
275 *tuba4a* encoding α-tubulin and chaperone gene *tbca* were up-regulated in the muscle during FR and  
276 RE with highest expression at FR (fig. 3D), likely indicative of maintenance of tubulin pool, which  
277 becomes more important at low temperatures that give rise to MT destabilization. Meanwhile, genes  
278 involved in post-translational modification (PTM) of tubulins (*map4*, *tpgs2* and *tll4*) (Wang, et al.  
279 2022) also exhibited a tissue-specific elevation at FR (fig. 3D). Such alterations may be important  
280 in promoting MT cold stability. With respect to more cold-resistant MF, we observed a highly  
281 expressed *actb* with a set of genes encoding actin-binding proteins profilin (*pfn2*), gelsolin (*gsn*),  
282 cofilin (*cfl*), and arp2/3 complex (*arpc1b*, *arpc4* and *arpc2*) that required for the polymerization  
283 and depolymerization of actin filaments (Pollard 2016) showed significant up-regulation in muscle  
284 tissue during FR. Simultaneously, upstream regulators of cofilin and arp2/3 complex such as *limk1*,  
285 *ssh2*, *wave2*, *cdc42*, *rac1*, and *rhoc* (Campellone and Welch 2010; Mizuno 2013) also exhibited  
286 obviously different expression patterns, representing a dynamic regulation on actin cytoskeleton  
287 (fig. 3B and D). Furthermore, we also found that genes e.g., *krt13*, *lmna*, and *lap2* that participate  
288 in assembly or PTM of IF (Naetar, et al. 2017; Wu, et al. 2017) showed significant expression  
289 fluctuation in muscle tissue during FR and RE (fig. 3D). Real-time quantitative PCR (qRT-PCR)  
290 analysis of selected genes were consistent with the transcriptome analysis (supplementary fig. S14A  
291 and B). Collectively, our analyses provide gene evolution and expression evidence for adaptive  
292 modification of cytoskeleton, and thus may play vital roles in maintaining cell viability after  
293 enduring freeze/thaw.

294

### 295 **Cryoprotectants and transmembrane transporters**

296 A well know strategy for freezing survival is the accumulation of large quantities of low  
297 molecular weight cryoprotectants not only reducing ice formation but also limiting cell shrinkage  
298 via osmic effects (Storey and Storey 1986, 1996b). Sugars (e.g. glucose, trehalose), polyhydric  
299 alcohols (e.g. glycerol, sorbitol) and amino acid (e.g. proline) are common colligative (concentration  
300 dependent) cryoprotectants among cold-hardy amphibians and insects, and urea contributes in some  
301 cases in amphibians (Storey and Storey 2017; Toxopeus and Sinclair 2018). Our metabolomic  
302 profiles identified a variety of putative cryoprotectants showed distinct fluctuations in muscle and  
303 liver of Amur sleeper during FR and RE. Unexpectedly, glucose was the top among sugars, but only  
304 showed an apparent increase (3.6-fold) in muscle during FR (fig. 4A). Myo-inositol and glycerol  
305 were found to be the highest polyhydric alcohols in both tissues but with no significant fluctuations  
306 during FR while the followed arabitol had a remarkable rise in muscle (5.8-fold) (fig. 4A). Despite  
307 a global repression in amino acid metabolism, aspartic acid showed a substantial augment (7.88-  
308 fold) in muscle (fig. 4A), suggesting a potential protective role. This higher accumulation but less

309 variation in contents for potential cryoprotectants in Amur sleeper likely indicative of a seasonal  
310 acquisition but not a freeze response, which agree with the contradictory reports regarding the  
311 changes of glucose or glycerol levels in different freeze tolerant frogs (Layne Jr and Jones 2001;  
312 Irwin and Lee 2003; Niu, et al. 2018). On the other hand, a recent study has suggested that multiple  
313 cryoprotectants (myo-inositol, proline, and trehalose) contribute to freeze tolerance largely via non-  
314 colligative mechanisms with each molecular is interchangeable and has a unique cryoprotective  
315 function (Toxopeus, et al. 2019).

316 During freezing, glycogenolysis is clearly the dominant pathway leading to produce  
317 cryoprotectants glucose and polyhydric alcohols. In Amur sleeper liver, we observed a sharp drop  
318 in glycogen level (as much as about 133-fold) and obvious rise in UDP-glucose (6.40-fold) and  
319 glucose-6-phosphate (2.92-fold) (fig. 4B, supplementary fig. S15). Meanwhile, the significant  
320 lactate accumulation at FR indicates glucose served as fuel for anaerobic metabolism  
321 (supplementary fig. S15).  $\beta$ -adrenergic signaling (the fight-or-flight response) response triggered by  
322 adrenaline has been linked with the rapid activation of glycogenolysis (Storey and Storey 1996a).  
323 Consistently, adrenaline rose 2.20-fold and the expression of beta-1 adrenergic receptor (*adrb1*) and  
324 beta-2 adrenergic receptor (*adrb2*) were significantly up-regulated (supplementary fig. S15, fig. 4B  
325 and C) at FR. Moreover, glucose-6-phosphatase (*g6pc*), which convert Glu-6-p to glucose in the  
326 terminal step of the synthesis of glucose (Foster, et al. 1997), was found to be significantly up-  
327 regulated (fig. 4B and C). Simultaneously, glucose 6-phosphatedehydrogenase (*g6pdh*) decreased  
328 obviously, this suppression could prevent Glu-6-p from being used for other purposes (Cowan and  
329 Storey 2001). It is notable that *g6pc* of the Amur sleeper was also identified as a REG and has nine  
330 specific amino acid replacements (fig. 4B, supplementary fig. S16A), four of them located in  
331 transmembrane domains (supplementary fig. S16B). Moreover, glycerol-3-phosphate phosphatase  
332 (*g3pp*), a crucial enzyme for glycerol biosynthesis (Raymond 2015) experienced an elevated rate of  
333 evolution (fig. 4B). These genetic changes might promote glucose and glycerol synthesis in the liver,  
334 which could be exported and circulated throughout the entire body for cryoprotection before  
335 freezing.

336 The formation of ice crystals and the accumulation of cryoprotectants have profound effects  
337 on the water content of cells as well as elevating osmolality (Storey and Storey 2013). The  
338 Aquaporins (AQPs) play an essential role in rapid osmoregulation as they allow for the facilitated  
339 diffusion of water and osmolytes across cell membranes (Hill, et al. 2004). There are two subsets of  
340 the AQP family, AQP1, AQP2, AQP4, and AQP5 that are permeated only by water and AQP3, AQP7  
341 and AQP9 that can also be permeated by glycerol and even larger solutes (Verkman and Mitra 2000).  
342 In this study, the *aqp3* and *aqp4* were identified as REGs in the Amur sleeper (fig. 4B), and *aqp4*  
343 has five specific amino acid mutations that can cause polarity changes. These mutations including  
344 three alanine (A) to glycine (G) substitution occurred at highly conserved sites in the corresponding  
345 proteins of other fish species (fig. 4D). Furthermore, the generally increased expression levels of  
346 *aqp1*, *aqp3*, *aqp4* and *aqp7* in different tissues at FR provided functional evidence that these AQPs  
347 are extremely important to control ice content, cell volume, and maintain fluid homeostasis in Amur  
348 sleeper (fig. 4C). For glucose transport, transcript levels for members of the glucose transporter  
349 (GLUT) family *glut2* and *glut9* were significantly increased in liver at FR in Amur sleeper (fig. 4B  
350 and C), suggesting a rapid uptake of cryoprotective glucose during the onset of freezing. Moreover,  
351 *glut2* was found to be underwent rapid evolve in Amur sleeper and up-regulated during RE (fig. 4B).  
352 Indeed, *glut2* is a unique bidirectional transporter also allows for hepatocytic reuptake of glucose

353 during thawing to restore glycogen pools and mitigate hyperglycemia (Storey and Storey 1986;  
354 Mueckler and Thorens 2013). Such dynamic regulation of *glut2* expression is crucial to surviving  
355 freezing and thawing in organisms that employ glucose as cryoprotectant, which has been  
356 demonstrated in amphibians (Storey and Storey 1988; Rosendale, et al. 2014). The expression trends  
357 of genes that were found to be regulated in this part were validated by qRT-PCR analysis  
358 (supplementary fig. S14D and E). Taken together, genes associated with metabolic enzymes and  
359 transmembrane transporters may contribute to freeze tolerance by facilitating cryoprotectants  
360 synthesis and redistribution of water and cryoprotectants, although the effects of these mutations  
361 still need further investigation.

362

### 363 **Gene changes correlate with nerve activity**

364 Freeze tolerant animals endure a prolonged state of frozen dormancy with interrupted nerve  
365 transmission (Storey and Storey 2017). Thus, a mechanism involved in the entry/exit and  
366 maintenance of dormant state over freeze/thaw is likely a key innovation, but this subject has  
367 received almost no attention in ectothermic vertebrates. It has been demonstrated that suppression  
368 of the central nervous system (CNS) plays a key role in the entrance into hibernation in mammals  
369 (Tamura, et al. 2005; Mohr, et al. 2020). Therefore, depressed neurotransmission activity in freeze  
370 tolerant ectothermic vertebrates when facing freezing would be expected. In the present study, we  
371 found a total of nine copies of the adenosine A1-receptor (*adora*) in the *P. glenii* genome, seven of  
372 which are tandemly duplicated and situated between *slc12a5* and *cyp24a1* genes (fig. 5A). This  
373 receptor is generally linked to the inhibition of the release of neurotransmitters with its most  
374 prominent inhibitory action on the excitatory glutamatergic system (Dunwiddie and Masino 2001).  
375 Such significant expansion might be important for the induction or maintenance of the dormant state  
376 in the Amur sleeper by suppressing neurotransmission. Interestingly, we found that *gabrg2*,  
377 encoding the  $\gamma 2$  subunit of gamma-aminobutyric acid receptor type A that mediates the inhibition  
378 of the CNS by combining with gamma-aminobutyric acid (GABA), possesses a strong signal of  
379 positive selection in the Amur sleeper. Remarkably, a total of 14 positively selected sites were  
380 detected, which is also highly conserved in human, mouse, and chicken (fig. 5B). Among them, 12  
381 were located in the extracellular ligand-binding domain (fig. 5B). Furthermore, our transcriptomic  
382 analyses identified multiple genes (*gad2*, *glna*, *snat2*, *snat3*, *pkaca* and *pkcb*) in GABAergic  
383 synaptic pathway exhibited increased expression in brain tissue during FR and RE. Exposure of  
384 zebrafish to GABA-enhancing drugs, and mice fed with high GABA-containing black sticky rice  
385 giant embryo have antianxiety effects (Stewart, et al. 2011; Jung, et al. 2017). Thus, natural selection  
386 on *gabrg2* and increased expression of the genes involved in GABAergic synaptic might have  
387 important antianxiety role, which perhaps could relieve freezing-induced stresses and facilitate  
388 entering dormancy.

389 In concert with the receptors that mediate neural inhibition, we found metabotropic glutamate  
390 receptor 5 (*mglur5*) that modulates cell excitability and synaptic transmission, was under positive  
391 selection in the Amur sleeper. Two positively selected sites (C607L and L608T) were identified on  
392 the conserved dimer interface (supplementary fig. S18). The *mglur5* receptor exists as dimers and  
393 monomers only contact via the extracellular domains in the inactive state, however, the dimer will  
394 undergo massive conformational change that bring the seven transmembrane domains closer  
395 together and into contact when it is activated (Llinas del Torrent, et al. 2019). In addition to  
396 increasing neuronal excitability, *mglur5* also play important roles in the induction of long-lasting

397 forms of synaptic plasticity, long-term depression (Niswender and Conn 2010). These two mutations  
398 may change the nerve conductance in the Amur sleeper and thus may have implications for its neural  
399 activity maintenance while frozen and reactivation upon thawing.

400 Besides genetic changes related to neurotransmission, ubiquitination (Ub) represent a dynamic  
401 PTM that precisely modulates the functional neuronal circuits. In Amur sleeper genome, we found  
402 six copies of f-box only protein 2 (fbxo2) that were tandemly duplicated and they situated between  
403 *bin2* and *svbp*. Particularly, two Amur sleeper-specific deletions of amino acid that could affect the  
404 three-dimensional structure of the protein were detected in all copies of these proteins, which was  
405 validated by mapping to both full-length and NGS transcripts. (fig. 5C, supplementary fig. S19).  
406 Fbxo2 is a subunit of the ubiquitin protein ligase complex SCF, which function in Ub-mediated  
407 degradation of GluN1 subunit of the NMDA receptors that mainly mediate neural excitatory  
408 transmission (Otsu, et al. 2019). GluN1 knockout mice have hyperactivity compared to wild-type  
409 mice (Segev, et al. 2020). Given that fbxo2 has been shown to facilitate the degradation of the GluN1  
410 (Atkin, et al. 2015), the genetic changes of fbxo2 in Amur sleeper may suggest an inhibition of  
411 excitatory transmission. Taken together, the Amur sleeper-specific genetic innovations might thus  
412 indicate a role for adaptive evolution in function of the nervous system. Analysis of the variations  
413 in these genes may yield insights into how nerve regulation is coordinated upon freezing and  
414 thawing. Additionally, genes reported here are associated with multiple neurological and  
415 neuropsychiatric disorders in human, we expected that the genetic changes in the Amur sleeper may  
416 provide useful information for studies in mental illnesses and medical anesthesia.

417

## 418 **Conclusion**

419 Freeze tolerance, a fascinating example of complex animal adaptations, has been extensively  
420 investigated in multiple hibernating reptile and amphibian species. However, the genetic basis for  
421 freezing survival remains unclear and the underlying molecular mechanisms are still inadequate  
422 understood in ectothermic vertebrates. Our study demonstrates the strengths of multi-omic methods  
423 to shed light on this adaptation in the only known fish species with freeze tolerant ability. Using an  
424 integrated analysis of multi-omic data, we revealed a suite of coordinated molecular adaptations in  
425 the Amur sleeper related to hypometabolism and cell repair that may mitigate the detrimental effects  
426 of freezing and thawing. Many significant genetics changes correlated with cytoskeletal stability,  
427 osmotic regulation, and nerve activity could be regarded as evolutionary innovations, which lay a  
428 blueprint for further functional characterization. This study not only provides useful genomic  
429 resources and insights into freeze-tolerant adaptation in ectothermic vertebrates, but also has  
430 potential implications for the development of better cryopreservation technologies and the unveiling  
431 of the causes of mental diseases in biomedical field.

432

## 433 **Materials and Methods**

### 434 **Genome sequencing and de novo assembly**

435 Wild individuals of *P. glenii* and *N. hainanensis* were collected from Heilongjiang and Guangxi  
436 Province, respectively. All experiments in this study were approved by the Institutional Animal Care  
437 and Use Committee of Institute of Hydrobiology, Chinese Academy of Sciences (Approval ID:  
438 Y21304506), and conducted in compliance with the relevant guidelines. Muscle tissues from *P.*  
439 *glenii* and *N. hainanensis* were used for DNA extraction and genome sequencing. For *P. glenii*, a  
440 total of 70.29 Gbp of long reads and 101.02 Gbp of short reads were generated. For *N. hainanensis*,

441 a total of 86.06 Gbp of long reads and 121.71 Gbp of short reads were generated. The long reads  
442 were sequenced using the PrometION DNA sequencer on the Oxford Nanopore platform and the  
443 short reads were generated on the BGISEQ-500 platform. For Hi-C sequencing of *P. glenii*, liver  
444 tissue was used for the extraction of DNA for library preparation. Hi-C libraries were then sequenced  
445 on the Illumina NovaSeq platform, and a total of 95.60 Gbp Hi-C reads were generated  
446 (supplementary table S1).

447 We adapted the KmerFreq\_AR program from SOAPdenovo2 package, which is based on k-  
448 mer distribution, to estimate the genome size with about 45 Gb of BGISEQ-500 short reads filtered  
449 using fastp (Chen, et al. 2018). The estimated genome size of *P. glenii* and *N. hainanensis* were  
450 827.25 Mb and 840.86 Mb, respectively (supplementary table S9). First, Nanopore long reads of  
451 the two species were corrected using the NextCorrect modules of NextDenovo  
452 (<https://github.com/Nextomics/NextDenovo>). For *P. glenii*, we used wtdbg2 (Ruan and Li 2020),  
453 Flye (Kolmogorov, et al. 2019), and Smartdenovo (<https://github.com/ruanjue/smartdenovo>) for de  
454 novo assembly with corrected long reads due to the high heterozygosity of the estimated genome  
455 characteristics (supplementary fig. S1, supplementary table S9). Next, we applied three rounds of  
456 polishing using filtered short reads with Pilon1.23 (Walker, et al. 2014). We also filtered the  
457 redundant contigs caused by high heterozygosity using the script fasta2homozygous.py from  
458 Redundans (<https://github.com/lpryszcz/redundans>). The quality of these three genomes were  
459 assessed. Finally, Hi-C reads were aligned to the best assembly version via Bowtie 1.2.2 (Langmead  
460 2010). We then used Juicer v1.5 (Durand, Shamim, et al. 2016) and 3D-DNA (Dudchenko, et al.  
461 2017) to anchor the draft genome onto 22 chromosomes. Juicerbox Assembly Tools (Durand,  
462 Robinson, et al. 2016) was used to visualize and improve the assembly quality. For *N. hainanensis*,  
463 the Nanopore reads were assembled by wtdbg2 and then three rounds of polishing using NSG short  
464 reads were applied. To estimate the quality of the two genomes, short reads were mapped back to  
465 the genome using BWA-MEM (Li and Durbin 2009). Completeness of the two genomes was  
466 evaluated using Busco v3 (Simão, et al. 2015) with the actinopterygii\_odb9 database.

467

#### 468 **Genome prediction annotation**

469 We combined RepeatMasker v4.06 (Tarailo - Graovac and Chen 2009) with  
470 RepeatProteinMask v4.06 for homology repeat sequence prediction by aligning the genome  
471 sequences against the RepBase library. For de novo repeat prediction, we adopted RepeatModeler  
472 v1.08 along with LTR-FINDER v1.06 (Xu and Wang 2007) based on the de novo repeat library.

473 We used three different methods, namely, ab initio annotation, homology annotation and  
474 transcriptome-based annotation, to predict the whole gene set for the two genomes. Briefly,  
475 Augustus (Stanke, et al. 2008), Snap (Leskovec and Sosič 2016) and GeneScan (Burge and Karlin  
476 1997) were used for de novo gene prediction based on the repeat masked genome sequences. The  
477 Augustus and Snap programs were trained with the transcript and zebrafish genome training set,  
478 respectively. For homology-based annotation, protein sequences from *Oreochromis niloticus*,  
479 *Oryzias latipes*, *Danio rerio*, *Anabas testudineus*, *Neogobius melanostomus* and *Poecilla formosa*  
480 were downloaded from Ensembl and aligned to the two genomes using the TBLASTN program.  
481 GeneWise (Birney, et al. 2004) was used to identify accurate gene structures for the alignment  
482 produced by TblastN. In addition, GeMoMa (Keilwagen, et al. 2019) was used for homology-based  
483 prediction with the zebrafish genome as a reference genome. For transcriptome-based annotation, a  
484 total of 62.49 Gb of RNA-seq reads from ten tissues of *P. glenii* and 87.30 Gb from nine tissues for

485 *N. hainanensis* were generated by BGISEQ-500 (supplementary table S10). We also performed full-  
486 length transcriptome sequence, a total of 8,570,679 subreads with a mean length of 2,009 bp for *P.*  
487 *glenii* and 16,621,922 subreads with a mean length of 1719 bp for *N. hainanensis* were generated in  
488 PACBIO\_SMRT platform (supplementary table S11). RNA-seq reads were mapped to the genomes  
489 using Hisat2 (Kim, et al. 2015), and then transcripts were generated using StringTie (Pertea, et al.  
490 2015). Full-length transcriptome data were used to construct consensus sequences using IsoSeq3  
491 (<https://github.com/PacificBiosciences/IsoSeq>), and subsequently mapped to the genomes with  
492 Gmap (Wu and Watanabe 2005). Both types of transcripts were then processed with PASA (Haas,  
493 et al. 2003) to obtain final results. Finally, all gene models generated from these three strategies  
494 were integrated with EVIDENCEModeler (EVM) (Haas, et al. 2008). Functional annotations of the  
495 predicted gene set were obtained by mapping to public functional databases, including SwissProt,  
496 NCBI-Nr, KEGG, GO and InterPro.

497

### 498 **Syntenic relationship with the dark sleeper genome**

499 To evaluate the consistency of the Amur sleeper with its close relative, the dark sleeper  
500 (*Odontobutis potamophila*), we assembled and annotated the genome of dark sleeper based on raw  
501 data downloaded from NCBI (Jia, et al. 2021). First, the coding sequences from 22 autosomal  
502 chromosomes of the two species were aligned by LAST v942 (Kielbasa, et al. 2011). The results  
503 were then subjected to MCscan (Tang, et al. 2008) to identify syntenic blocks.

504

### 505 **Phylogenetic analysis**

506 In addition to *P. glenii* and *N. hainanensis*, genomes of eight other teleosts, including *O.*  
507 *potamophila*, *O. niloticus*, *O. latipes*, *D. rerio*, *N. melanostomus*, *P. Formosa*, *Gasterosteus*  
508 *aculeatus*, and *Takifugu rubripes* were used to perform comparative genomic analyses. First, we  
509 identified orthologous gene clusters using OrthoFinder v2.3.4 (Emms and Kelly 2015) with default  
510 parameters. A total of 4550 single-copy genes were identified in the 10 species. Protein sequences  
511 for each single-copy orthologue were aligned using MAFFT v7.310 (Katoh and Standley 2013) and  
512 then corresponding coding sequence alignments were obtained with pal2nal v14 (Suyama, et al.  
513 2006). We removed poorly aligned regions of each CDS alignment using Gblocks v0.91b (Talavera  
514 and Castresana 2007) with the codon model. Then the alignments of less than 50 codons were  
515 discarded (Wu, et al. 2021). All the filtered CDS were concatenated into super-genes for each  
516 species to construct a phylogenetic tree using RAXML v8.2.4 (Stamatakis 2014) with 1,000 ultrafast  
517 bootstrap replicates. To estimate divergence times, MCMCtree from the PAML software package  
518 was performed on the inferred phylogenetic tree with *D. rerio* as the outgroup and fourfold  
519 degenerate sites (4D) extracted from the super-genes. We set four calibration time points (*G.*  
520 *aculeatus*–*T. rubripes* ~99–127 Ma; *O. niloticus*–*O. latipes* ~88–139 Ma; *N. melanostomus*–*P. glenii*  
521 ~59–89 Ma; *G. aculeatus*–*D. rerio* ~206–252 Ma) taken from TimeTree database to calibrate the  
522 calculated divergence times.

523

### 524 **Inference of demographic history**

525 We inferred the demographic histories of *P. glenii* and *N. hainanensis* by pairwise sequentially  
526 Markovian coalescent (PSMC) analysis (Li and Durbin 2011). NSG short reads used for the genome  
527 assemblies were aligned to the two reference genomes using BWA-MEM (Li and Durbin 2009) with  
528 default parameters. To generate consensus diploid sequences of the two individuals severally, the

529 SAMtools mpileup with bcftools and vcfutils.pl pipeline (<https://github.com/lh3/psmc>) was applied.  
530 We then used the fq2psmcfa program of PSMC to convert the consensus fastq files into psmcfa  
531 format, the input files for PSMC. Finally, the effective population history was inferred using PSMC  
532 with 100 bootstraps and plotted by the psmc\_plot.pl pipeline based on a substitution rate of 2.89e-9  
533 per generation for *P. glenii* and 3.11e-9 per generation for *N. hainanensis*.

534

#### 535 **Mutation rate and strength of natural selection**

536 We chose four closely related species for whole-genome synteny alignment using LAST v942  
537 (Kielbasa, et al. 2011) with *O. potamophila* genome sequence used as a reference. The aligned  
538 results were submitted to the subprogram “roast” of Multiz v3 (Blanchette, et al. 2004) to generate  
539 one-to-one alignment sequences. A sliding window (100kb) along the synteny alignment was  
540 applied to estimate the mutation rate. First, the branch lengths for each window were estimated  
541 using RAxML (Stamatakis 2014) based on neutral regions (repetitive sequences, regions located  
542 within genes and 3kb upstream/downstream) of every window were filtered. Then, the mutation  
543 rates were calculated with r8s using the estimated branch lengths and divergence time previously  
544 estimated. In addition, we calculated the  $\omega$ (*ka/ks*) ratios based on 4,550 one-to-one orthologues from  
545 the ten teleosts. The free-ratio model, allowing a separate  $\omega$  for each branch of a tree, from the  
546 codeml program in PAML (Yang 2007) was run on the concatenated orthologues and each of the  
547 orthologues.

548

#### 549 **Gene family expansion and contraction**

550 We used CAFE v3.1(De Bie, et al. 2006) to test for the expansion and contraction of gene  
551 families in *P. glenii* based on the results from the OrthoFinder (Emms and Kelly 2015) analyses and  
552 the estimated divergence times from MCMCTree. If the copy number of the *P. glenii* was higher or  
553 lower than that of its close ancestral branch lineage, then we identified this gene family as  
554 substantially expanded or contracted gene family. Any gene family, with a false discovery rate (FDR)  
555 adjusted P-value < 0.05, was thought to experience significant expansion or contraction. Functional  
556 categories and pathways in significantly expanded gene families were identified by performing GO  
557 terms enrichment analysis and KEGG pathway enrichment analysis. GO terms or KEGG pathways  
558 with a p-value <0.05 were considered significantly enriched.

559

#### 560 **Identification of positively and rapidly evolved genes**

561 All one-to-one orthologous genes were used to assess the contribution of natural selection on  
562 the *P. glenii* genome by calculating the ratios ( $\omega$ ) of nonsynonymous substitution (dN) to  
563 synonymous substitution (dS) using the software package PAML4 (Yang 2007). The two-ratio  
564 branch model (model=2, NSsites=0) was used to detect REGs and branch-site model (model=2,  
565 NSsites=2) was used to detect PSGs, with *P. glenii* as the foreground branch. Likelihood ratio tests  
566 (LRTs) were applied to test the significance of the differences between alternative and null models  
567 for each orthologue. We treated a gene as a REG when the FDR-adjusted p-value < 0.05 and a higher  
568  $\omega$  ratio in *P. glenii*. Genes with p < 0.05 were considered as PSG. Finally, we removed the false  
569 positive results by manual checking. The final REGs and PSGs were then assessed for enrichment  
570 of functional categories and pathways.

571

572

## 573 **Transcriptome sequencing and analysis**

574 Samples were collected from fish in September 2020, late February 2021, and late March 2021  
575 to represent AC, FR and RE stages, respectively, with 6 fish collected at each time point. Brain,  
576 muscle, and liver tissue were collected for a total of 54 samples. RNA was extracted from 27 samples  
577 (three replicates per stage) using TRIzol (Invitrogen, USA) to generate paired-end (PE) libraries.  
578 Each library was sequenced on an Illumina HiSeq platform with 150 bp PE reads. A total of 206.81  
579 Gb clean data were generated (supplementary table S12). Clean reads were mapped to the reference  
580 *P. glenii* genome using Hisat2 (Kim, et al. 2015). StringTie (Pertea, et al. 2015) was then used to  
581 generate gene expression level counts in fragments per kilobase of transcript per million fragments  
582 mapped (FPKM). PCA was performed based on the expression pattern of all genes. To identify  
583 DEGs between the different life stages, the number of reads mapped to gene regions was quantified  
584 by the FeatureCounts program (Liao, et al. 2014), a part of the Subread package v2.0.0  
585 (<http://subread.sourceforge.net/>). The R package DESeq2 (Love, et al. 2014) was used for the  
586 detection of DEGs based on the read count table generated by featureCounts. An FDR adjusted p  
587 value < 0.05 and a 2-fold-change > 2 was set as the level of significance. Enrichment of KEGG  
588 pathways and GO terms of the DEGs was estimated using the annotations of all identified transcripts  
589 as a background.

590

## 591 **Metabolite extraction, detection, and analysis**

592 Muscle and liver samples from 18 fish (6 replicates per stage) were used for LC–MS/MS  
593 analysis. 50mg of each sample was homogenized with 1000 µl of ice-cold methanol/water (70%,  
594 v/v). The supernatant was extracted to detect metabolites using a combination of non-targeted  
595 detection (Ultra-performance liquid chromatography (UPLC) and Quadrupole-Time of Flight) and  
596 widely targeted detection (UPLC and Tandem mass spectrometry (MS/MS)). PCA was performed  
597 using statistics function prcomp within R to identify general trends in the content changes.  
598 Metabolites with VIP (variable importance in projection)  $\geq 1$ , absolute Log<sub>2</sub>FC (fold change)  $\geq$   
599 1 and FDR-p value < 0.05 were regarded as SDMs. Identified metabolites were annotated using the  
600 KEGG Compound database (<http://www.kegg.jp/kegg/compound/>), and then annotated metabolites  
601 were mapped to the KEGG Pathway database (<http://www.kegg.jp/kegg/pathway.html>).

602

## 603 **Real-time quantitative PCR assay**

604 To validate DEGs across different life stages of *P. glenii*, qRT-PCR was performed. First strand  
605 cDNA was synthesized from 1ug of total RNA samples using Hifair<sup>®</sup> II 1<sup>st</sup> Strand cDNA Synthesis  
606 SuperMix for qRT-PCR (Yeasen, China). The qRT-PCR was performed with the Hieff<sup>®</sup> qPCR  
607 SYBR<sup>®</sup> Green Master Mix (Yeasen, China) and a LightCycler 480 II Instrument (Roche,  
608 Switzerland). Six biological replicates and three reaction replicates for each group were used.  
609 Expression values were calculated using the detected threshold cycle (Ct) value using the geNorm  
610 algorithm. Non-tissue-specific reference genes elongation factor alpha (ef1a) and 18S rRNA were  
611 selected as internal controls to normalize the relative expression levels. Statistical analysis was  
612 performed using an unpaired two-tailed Student's t test.

613

## 614 **Acknowledgments**

615 This research was supported by the Strategic Priority Research Program of Chinese Academy of  
616 Sciences (Grant No. XDB31000000), the National Natural Science Foundation of China (32170480,



617 31972866), Youth Innovation Promotion Association, Chinese Academy of Sciences  
618 (<http://www.yicas.cn>), State Key Laboratory of Genetic Resources and Evolution, Kunming  
619 Institute of Zoology, Chinese Academy of Sciences (GREKF21-04), and the Young Top-notch  
620 Talent Cultivation Program of Hubei Province. This research was supported by the Wuhan Branch,  
621 Supercomputing Center, Chinese Academy of Sciences, China. We also thank Dr Baosheng Wu and  
622 Dr Chenguang Feng for their help in our comparative genome analyses.

623

#### 624 **Author Contributions**

625 L.Y. and S.H. designed and managed the project. H.J., Y.L., and H.B. collected and prepared the  
626 Amur sleeper samples. W.L, Y.Q. and M.M. performed genome assembly and gene annotation. W.L.,  
627 H.J., and C.W. conducted the bioinformatic analysis and transcriptome, metabolism analysis. W.L.,  
628 H.J., D.I., N.S., and F.C. wrote and revised the manuscripts.

629

#### 630 **Conflict of Interest statement**

631 The authors declare no competing interests.

632

#### 633 **Data availability statement**

634 The sequence data have been deposited in the NCBI BioProject database with accession  
635 numbers PRJNA818152 (*P. glenii*), PRJNA818180 (*N. hainanensis*). The genome assembly files  
636 are under accession numbers JALDQB000000000 (*P. glenii*) and JALDNG000000000 (*N.*  
637 *hainanensis*).

638

#### 639 **Reference**

- 640 Alberts B, Johnson A, Lewis J, Raff M, Roberts K, Walter P. 2002. The cytoskeleton and cell  
641 behavior. In. Molecular Biology of the Cell. 4th edition. New York: Garland Science.
- 642 Aruoma O, Halliwell B, Hoey BM, Butler J. 1988. The antioxidant action of taurine, hypotaurine  
643 and their metabolic precursors. *Biochem J.* 256:251-255.
- 644 Atkin G, Moore S, Lu Y, Nelson RF, Tipper N, Rajpal G, Hunt J, Tennant W, Hell JW, Murphy GG,  
645 et al. 2015. Loss of F-box only protein 2 (Fbxo2) disrupts levels and localization of select  
646 NMDA receptor subunits, and promotes aberrant synaptic connectivity. *J Neurosci.* 35:6165-  
647 6178.
- 648 Baldassari S, Licchetta L, Tinuper P, Bisulli F, Pippucci T. 2016. GATOR1 complex: the common  
649 genetic actor in focal epilepsies. *J Med Genet.* 53:503-510.
- 650 Birney E, Clamp M, Durbin R. 2004. GeneWise and genomewise. *Genome Res.* 14:988-995.
- 651 Blanchette M, Kent WJ, Riemer C, Elnitski L, Smit AF, Roskin KM, Baertsch R, Rosenbloom K,  
652 Clawson H, Green ED, et al. 2004. Aligning multiple genomic sequences with the threaded  
653 blockset aligner. *Genome Res.* 14:708-715.
- 654 Bradley Shaffer H, Minx P, Warren DE, Shedlock AM, Thomson RC, Valenzuela N, Abramyan J,  
655 Amemiya CT, Badenhorst D, Biggar KK, et al. 2013. The western painted turtle genome, a  
656 model for the evolution of extreme physiological adaptations in a slowly evolving lineage.  
657 *Genome Biol.* 14:1-23.
- 658 Burge C, Karlin S. 1997. Prediction of complete gene structures in human genomic DNA. *J Mol*  
659 *Biol.* 268:78-94.
- 660 Campellone KG, Welch MD. 2010. A nucleator arms race: cellular control of actin assembly. *Nat*

- 661 *Rev Mol Cell Bio.* 11:237-251.
- 662 Carey HV, Andrews MT, Martin SL. 2003. Mammalian hibernation: cellular and molecular  
663 responses to depressed metabolism and low temperature. *Physiol Rev.*
- 664 Chai L, Huang P, Bao x. 2020. Tolerant ability and physiological and biochemical responses of  
665 Chinese sleeper *Perccottus glenii* to icing up and hypoxia environment. *J Dalian Ocean Univ.*  
666 35:218-222. (Chinese with English abstract)
- 667 Chen S, Zhou Y, Chen Y, Gu J. 2018. fastp: an ultra-fast all-in-one FASTQ preprocessor.  
668 *Bioinformatics.* 34:i884-i890.
- 669 Clark PU, Dyke AS, Shakun JD, Carlson AE, Clark J, Wohlfarth B, Mitrovica JX, Hostetler SW,  
670 McCabe AM. 2009. The last glacial maximum. *Science.* 325:710-714.
- 671 Coronel L, Häckes D, Schwab K, Riege K, Hoffmann S, Fischer M. 2022. p53-mediated AKT and  
672 mTOR inhibition requires RFX7 and DDIT4 and depends on nutrient abundance. *Oncogene.*  
673 41:1063-1069.
- 674 Costanzo JP. 2019. Overwintering adaptations and extreme freeze tolerance in a subarctic  
675 population of the wood frog, *Rana sylvatica*. *J Com Physiol B.* 189:1-15.
- 676 Costanzo JP, Claussen DL. 1990. Natural freeze tolerance in the terrestrial turtle, *Terrapene carolina*.  
677 *J Exp Zool.* 254.
- 678 Costanzo JP, Lee RE. 2013. Avoidance and tolerance of freezing in ectothermic vertebrates. *J Exp*  
679 *Zool.* 216:1961-1967.
- 680 Cowan KJ, Storey KB. 2001. Freeze-thaw effects on metabolic enzymes in wood frog organs.  
681 *Cryobiology.* 43:32-45.
- 682 De Bie T, Cristianini N, Demuth JP, Hahn MW. 2006. CAFE: a computational tool for the study of  
683 gene family evolution. *Bioinformatics.* 22:1269-1271.
- 684 Des Marteaux LE, Stinziano JR, Sinclair BJ. 2018. Effects of cold acclimation on rectal  
685 macromorphology, ultrastructure, and cytoskeletal stability in *Gryllus pennsylvanicus* crickets.  
686 *J Insect Physiol.* 104:15-24.
- 687 Dias IB, Bouma HR, Henning RH. 2021. Unraveling the Big Sleep: Molecular aspects of stem cell  
688 dormancy and hibernation. *Front Physiol.* 12:424.
- 689 Dudchenko O, Batra SS, Omer AD, Nyquist SK, Hoeger M, Durand NC, Shamim MS, Machol I,  
690 Lander ES, Aiden AP, et al. 2017. De novo assembly of the *Aedes aegypti* genome using Hi-C  
691 yields chromosome-length scaffolds. *Science.* 356:92-95.
- 692 Dunwiddie TV, Masino SA. 2001. The role and regulation of adenosine in the central nervous  
693 system. *Annu Rev Neurosci.* 24:31-55.
- 694 Durand NC, Robinson JT, Shamim MS, Machol I, Mesirov JP, Lander ES, Aiden EL. 2016. Juicebox  
695 provides a visualization system for Hi-C contact maps with unlimited zoom. *Cell Syst.* 3:99-  
696 101.
- 697 Durand NC, Shamim MS, Machol I, Rao SS, Huntley MH, Lander ES, Aiden EL. 2016. Juicer  
698 provides a one-click system for analyzing loop-resolution Hi-C experiments. *Cell Syst.* 3:95-  
699 98.
- 700 Emms DM, Kelly S. 2015. OrthoFinder: solving fundamental biases in whole genome comparisons  
701 dramatically improves orthogroup inference accuracy. *Genome Biol.* 16:1-14.
- 702 Fletcher DA, Mullins RD. 2010. Cell mechanics and the cytoskeleton. *Nature.* 463:485-492.
- 703 Foster JD, Pederson BA, Nordlie RC. 1997. Glucose-6-phosphatase structure, regulation, and  
704 function: an update. *Proc Soc Exp Biol Med.* 215:314-332.

- 705 Fousteri M, Mullenders LH. 2008. Transcription-coupled nucleotide excision repair in mammalian  
706 cells: molecular mechanisms and biological effects. *Cell Res.* 18:73-84.
- 707 Giraud-Billoud M, Rivera-Ingraham GA, Moreira DC, Burmester T, Castro-Vazquez A,  
708 Carvajalino-Fernández JM, Dafre A, Niu C, Tremblay N, Paital B, et al. 2019. Twenty years of  
709 the 'Preparation for Oxidative Stress'(POS) theory: Ecophysiological advantages and  
710 molecular strategies. *Comp Biochem Phys A.* 234:36-49.
- 711 Haas BJ, Delcher AL, Mount SM, Wortman JR, Smith RK, Hannick LI, Maiti R, Ronning CM,  
712 Rusch DB, Town CD, et al. 2003. Improving the *Arabidopsis* genome annotation using  
713 maximal transcript alignment assemblies. *Nucleic Acids Res.* 31:5654-5666.
- 714 Haas BJ, Salzberg SL, Zhu W, Pertea M, Allen JE, Orvis J, White O, Buell CR, Wortman JR. 2008.  
715 Automated eukaryotic gene structure annotation using EVidenceModeler and the program to  
716 assemble spliced alignments. *Genome Biol.* 9:1-22.
- 717 Hans, Ramløv, and, Jennifer, Bedford, and, John, Leader. 1992. Freezing tolerance of the New  
718 Zealand alpine weta, *Hemideina maori* Hutton [Orthoptera; Stenopelmatidae]. *J Ther Biol.*  
719 17:51-54.
- 720 Hill A, Shachar-Hill B, Shachar-Hill Y. 2004. What are aquaporins for? *J Membrane Biol.* 197:1-32.
- 721 Hira HS, Samal P, Kaur A, Kapoor S. 2014. Plasma level of hypoxanthine/xanthine as markers of  
722 oxidative stress with different stages of obstructive sleep apnea syndrome. *Ann Saudi Med.*  
723 34:308-313.
- 724 Hlavanda E, Kovács J, Oláh J, Orosz F, Medzihradzky KF, Ovádi J. 2002. Brain-specific p25  
725 protein binds to tubulin and microtubules and induces aberrant microtubule assemblies at  
726 substoichiometric concentrations. *Biochemistry.* 41:8657-8664.
- 727 Irwin JT, Lee JRE. 2003. Geographic variation in energy storage and physiological responses to  
728 freezing in the gray treefrogs *Hyla versicolor* and *H. chrysoscelis*. *J Exp Biol.* 206:2859-2867.
- 729 Iwaya-Inoue M, Sakurai M, Uemura M. 2018. Survival strategies in extreme cold and desiccation.  
730 Singapore: Springer.
- 731 Jia Y, Zheng J, Liu S, Li F, Chi M, Cheng S, Gu Z. 2021. A Chromosome-Level Genome Assembly  
732 of the Dark Sleeper *Odontobutis potamophila*. *Genome Biol Evol.* 13:evaa271.
- 733 Joannis DR, Storey KB. 1996. Oxidative damage and antioxidants in *Rana sylvatica*, the freeze-  
734 tolerant wood frog. *Am J Physiol-Reg I.* 271:R545-R553.
- 735 Jung W-Y, Kim S-G, Lee J-S, Kim H-K, Son B-G, Kim J-W, Suh J-W. 2017. Effect of feeding high  
736 gamma-aminobutyric acid-containing giant embryo black sticky rice (*Oryza sativa* L.) on  
737 anxiety-related behavior of C57BL/6 mice. *J Med Food.* 20:777-781.
- 738 Karanova M. 2009. Free amino acid composition in blood and muscle of the gobi *Precottus glehni*  
739 at the period of preparation and completion of hibernation. *J Evol Biochem Phys+.* 45:67-77.
- 740 Katoh K, Standley DM. 2013. MAFFT multiple sequence alignment software version 7:  
741 improvements in performance and usability. *Mol Biol Evol.* 30:772-780.
- 742 Kayukawa T, Ishikawa Y. 2009. Chaperonin contributes to cold hardiness of the onion maggot *Delia*  
743 *antiqua* through repression of depolymerization of actin at low temperatures. *PLoS One.*  
744 4:e8277.
- 745 Keilwagen J, Wenk M, Erickson JL, Schattat MH, Grau J, Hartung F. 2016. Using intron position  
746 conservation for homology-based gene prediction. *Nucleic Acids Res.* 44:e89.
- 747 Kielbasa SM, Wan R, Sato K, Horton P, Frith MC. 2011. Adaptive seeds tame genomic sequence  
748 comparison. *Genome Res.* 21:487-493.

- 749 Kim D, Langmead B, Salzberg SL. 2015. HISAT: a fast spliced aligner with low memory  
750 requirements. *Nat Methods*. 12:357-360.
- 751 King AM, MacRae TH. 2015. Insect heat shock proteins during stress and diapause. *Ann Rev*  
752 *Entomol*. 60:59-75.
- 753 Koch OR, Fusco S, Ranieri SC, Maulucci G, Palozza P, Larocca LM, Cravero AA, Farre SM, De  
754 Spirito M, Galeotti T, et al. 2008. Role of the life span determinant P66shcA in ethanol-induced  
755 liver damage. *Lab Invest*. 88:750-760.
- 756 Kolmogorov M, Yuan J, Lin Y, Pevzner PA. 2019. Assembly of long, error-prone reads using repeat  
757 graphs. *Nat Biotechnol*. 37:540-546.
- 758 Kültz D. 2005. Molecular and evolutionary basis of the cellular stress response. *Annu Rev Physiol*.  
759 67:225-257.
- 760 Langmead B, Salzberg SL. 2012. Fast gapped-read alignment with Bowtie 2. *Nat Methods*. 9:357-  
761 359.
- 762 Layne Jr JR, Jones AL. 2001. Freeze tolerance in the gray treefrog: cryoprotectant mobilization and  
763 organ dehydration. *J Exp Zool*. 290:1-5.
- 764 Layne Jr JR, Kefauver J. 1997. Freeze tolerance and postfreeze recovery in the frog *Pseudacris*  
765 *crucifer*. *Copeia*. 260-264.
- 766 Lee D-F, Kuo H-P, Chen C-T, Hsu J-M, Chou C-K, Wei Y, Sun H-L, Li L-Y, Ping B, Huang W-C,  
767 et al. 2007. IKK $\beta$  suppression of TSC1 links inflammation and tumor angiogenesis via the  
768 mTOR pathway. *Cell*. 130:440-455.
- 769 Leitner A, Joachimiak LA, Bracher A, Mönkemeyer L, Walzthoeni T, Chen B, Pechmann S, Holmes  
770 S, Cong Y, Ma B, et al. 2012. The molecular architecture of the eukaryotic chaperonin  
771 TRiC/CCT. *Structure*. 20:814-825.
- 772 Leskovec J, Sosič R. (snap co-authors). 2016. Snap: A general-purpose network analysis and graph-  
773 mining library. *ACM T Intell Syst Tec*. 8:1-20.
- 774 Li H, Durbin R. (bwa co-authors). 2009. Fast and accurate short read alignment with Burrows-  
775 Wheeler transform. *Bioinformatics*. 25:1754-1760.
- 776 Li H, Durbin R. (Psmc co-authors). 2011. Inference of human population history from individual  
777 whole-genome sequences. *Nature*. 475:493-U484.
- 778 Li H, He Y, Jiang J, Liu Z, Li C. 2018. Molecular systematics and phylogenetic analysis of the Asian  
779 endemic freshwater sleepers (Gobiiformes: Odontobutidae). *Mol Phylogenet Evol*. 121:1-11.
- 780 Liao Y, Smyth GK, Shi W. 2014. featureCounts: an efficient general purpose program for assigning  
781 sequence reads to genomic features. *Bioinformatics*. 30:923-930.
- 782 Llinas del Torrent C, Casajuana-Martin N, Pardo L, Tresadern G, Pérez-Benito L. 2019.  
783 Mechanisms underlying allosteric molecular switches of metabotropic glutamate receptor 5. *J*  
784 *Chem Inf Model*. 59:2456-2466.
- 785 Llorca O, Martín-Benito J, Gómez-Puertas P, Ritco-Vonsovici M, Willison KR, Carrascosa JL,  
786 Valpuesta JM. 2001. Analysis of the interaction between the eukaryotic chaperonin CCT and  
787 its substrates actin and tubulin. *J Structural Biol*. 135:205-218.
- 788 Logan SM, Wu C-W, Storey KB. 2019. The squirrel with the lagging eIF2: global suppression of  
789 protein synthesis during torpor. *Comp Biochem Phys A*. 227:161-171.
- 790 Loomis S. 1995. Freezing tolerance of marine invertebrates. *Oceanogr Mar Biol*. 33:337-350
- 791 Love MI, Huber W, Anders S. 2014. Moderated estimation of fold change and dispersion for RNA-  
792 seq data with DESeq2. *Genome Biol*. 15:1-21.

- 793 Lu Q, Zhao Y, Gao X, Wu J, Zhou H, Tang P, Wei Q, Wei Z. 2018. Effect of tricarboxylic acid cycle  
794 regulator on carbon retention and organic component transformation during food waste  
795 composting. *Bioresource Technol.* 256:128-136.
- 796 Lv W, Jiang H, Bo J, Wang C, Yang L, He S. 2020. Comparative mitochondrial genome analysis of  
797 *Neodontobutis hainanensis* and *Perccottus glenii* reveals conserved genome organization and  
798 phylogeny. *Genomics.* 112:3862-3870.
- 799 Mizuno K. 2013. Signaling mechanisms and functional roles of cofilin phosphorylation and  
800 dephosphorylation. *Cell Signal.* 25:457-469.
- 801 Mohr SM, Bagriantsev SN, Gracheva EO. 2020. Cellular, molecular, and physiological adaptations  
802 of hibernation: the solution to environmental challenges. *Ann Rev Cell and Dev Bi.* 36:315-  
803 338.
- 804 Mueckler M, Thorens B. 2013. The SLC2 (GLUT) family of membrane transporters. *Mol Aspects*  
805 *Med.* 34:121-138.
- 806 Naetar N, Ferraioli S, Foisner R. 2017. Lamins in the nuclear interior– life outside the lamina. *J*  
807 *Cell Sci.* 130:2087-2096.
- 808 Niswender CM, Conn PJ. 2010. Metabotropic glutamate receptors: physiology, pharmacology, and  
809 disease. *Annu Rev Pharmacol.* 50:295-322.
- 810 Niu YG, Wang JJ, Men SK, Zhao YF, Lu SS, Tang XL, Chen Q. 2018. Urea and plasma ice-  
811 nucleating proteins promoted the modest freeze tolerance in Pleske's high altitude frog  
812 *Nanorana pleskei*. *J Comp Physiol B.* 188:599-610.
- 813 Otsu Y, Darcq E, Pietrajtis K, Mátyás F, Schwartz E, Bessaih T, Abi Gerges S, Rousseau C, Grand  
814 T, Dieudonné S, et al. 2019. Control of aversion by glycine-gated GluN1/GluN3A NMDA  
815 receptors in the adult medial habenula. *Science.* 366:250-254.
- 816 Ou J, Ball JM, Luan Y, Zhao T, Miyagishima KJ, Xu Y, Zhou H, Chen J, Merriman DK, Xie Z, et  
817 al. 2018. iPSCs from a hibernator provide a platform for studying cold adaptation and its  
818 potential medical applications. *Cell.* 173:851-863. e816.
- 819 Perteau M, Perteau GM, Antonescu CM, Chang T-C, Mendell JT, Salzberg SL. 2015. StringTie enables  
820 improved reconstruction of a transcriptome from RNA-seq reads. *Nat Biotechnol.* 33:290-295.
- 821 Pollard TD. 2016. Actin and actin-binding proteins. *Csh Perspect Biol.* 8:a018226.
- 822 Ramlov H, Westh P. 1993. Ice Formation in the Freeze-Tolerant Alpine Weta *Hemideina-Maori*  
823 *Hutton* (Orthoptera, Stenopelmatidae). *Cryo-Lett.* 14:169-176.
- 824 Raymond JA. 2015. Two potential fish glycerol-3-phosphate phosphatases. *Fish Physiol Biochem.*  
825 41:811-818.
- 826 Reshetnikov AN. 2003. The introduced fish, rotan (*Perccottus glenii*), depresses populations of  
827 aquatic animals (macroinvertebrates, amphibians, and a fish). *Hydrobiologia.* 510:83-90.
- 828 Reshetnikov AN, Ficaretola GF. 2011. Potential range of the invasive fish rotan (*Perccottus glenii*) in  
829 the Holarctic. *Biol Invasions.* 13:2967-2980.
- 830 Rosendale AJ, Lee Jr RE, Costanzo JP. 2014. Effect of physiological stress on expression of glucose  
831 transporter 2 in liver of the wood frog, *Rana sylvatica*. *J Exp Zool Part A.* 321:566-576.
- 832 Ruan J, Li H. 2020. Fast and accurate long-read assembly with wtdbg2. *Nat Methods.* 17:155-158.
- 833 Sanada Y, Asai S, Ikemoto A, Moriwaki T, Nakamura N, Miyaji M, Zhang-Akiyama Q-M. 2014.  
834 Oxidation resistance 1 is essential for protection against oxidative stress and participates in the  
835 regulation of aging in *Caenorhabditis elegans*. *Free Radical Res.* 48:919-928.
- 836 Schmid WD. 1982. Survival of Frogs in Low-Temperature. *Science.* 215:697-698.

- 837 Segev A, Yanagi M, Scott D, Southcott SA, Lister JM, Tan C, Li W, Birnbaum SG, Kourrich S,  
838 Tamminga CA. 2020. Reduced GluN1 in mouse dentate gyrus is associated with CA3  
839 hyperactivity and psychosis-like behaviors. *Mol Psychiatr.* 25:2832-2843.
- 840 Simão FA, Waterhouse RM, Ioannidis P, Kriventseva EV, Zdobnov EM. 2015. BUSCO: assessing  
841 genome assembly and annotation completeness with single-copy orthologs. *Bioinformatics.*  
842 31:3210-3212.
- 843 Sinbad OO, Folorunsho AA, Olabisi OL, Ayoola OA, Temitope EJ. 2019. Vitamins as antioxidants.  
844 *J Food Sci Nutr Res.* 2:214-235.
- 845 Stamatakis A. 2014. RAxML version 8: a tool for phylogenetic analysis and post-analysis of large  
846 phylogenies. *Bioinformatics.* 30:1312-1313.
- 847 Stanke M, Diekhans M, Baertsch R, Haussler D. 2008. Using native and syntenically mapped cDNA  
848 alignments to improve de novo gene finding. *Bioinformatics.* 24:637-644.
- 849 Stewart A, Wu N, Cachat J, Hart P, Gaikwad S, Wong K, Utterback E, Gilder T, Kyzar E, Newman  
850 A, et al. 2011. Pharmacological modulation of anxiety-like phenotypes in adult zebrafish  
851 behavioral models. *Prog Neuro-Psychoph.* 35:1421-1431.
- 852 Storey JM, Storey KB. 1996a.  $\beta$ -Adrenergic, hormonal, and nervous influences on cryoprotectant  
853 synthesis by liver of the freeze-tolerant wood frog *Rana sylvatica*. *Cryobiology.* 33:186-195.
- 854 Storey KB. 1990. Life in a frozen state: adaptive strategies for natural freeze tolerance in amphibians  
855 and reptiles. *Am J Physiol.* 258:R559-568.
- 856 Storey KB. 1987. Organ-specific metabolism during freezing and thawing in a freeze-tolerant frog.  
857 *Am J Physiol.* 253:R292-297.
- 858 Storey KB, Storey JM. 1988. Freeze tolerance in animals. *Physiol Rev.* 68:27-84.
- 859 Storey KB, Storey JM. 1986. Freeze tolerant frogs: cryoprotectants and tissue metabolism during  
860 freeze-thaw cycles. *Can J Zool.* 64:49-56.
- 861 Storey KB, Storey JM. 2020. Mitochondria, metabolic control and microRNA: advances in  
862 understanding amphibian freeze tolerance. *BioFactors.* 46:220-228.
- 863 Storey KB, Storey JM. 2013. Molecular biology of freezing tolerance. *Compr Physiol.* 3:1283-1308.
- 864 Storey KB, Storey JM. 2017. Molecular physiology of freeze tolerance in vertebrates. *Physiol Rev.*  
865 97:623-665
- 866 Storey KB, Storey JM. 1996b. Natural freezing survival in animals. *Annu Rev Ecol Evol S.* 27:365-  
867 386.
- 868 Suyama M, Torrents D, Bork P. 2006. PAL2NAL: robust conversion of protein sequence alignments  
869 into the corresponding codon alignments. *Nucleic Acids Res.* 34:W609-W612.
- 870 Talavera G, Castresana J. 2007. Improvement of phylogenies after removing divergent and  
871 ambiguously aligned blocks from protein sequence alignments. *Syst Biology.* 56:564-577.
- 872 Tamura Y, Shintani M, Nakamura A, Monden M, Shiomi H. 2005. Phase-specific central regulatory  
873 systems of hibernation in Syrian hamsters. *Brain Res.* 1045:88-96.
- 874 Tang HB, Bowers JE, Wang XY, Ming R, Alam M, Paterson AH. 2008. Perspective - Synteny and  
875 collinearity in plant genomes. *Science.* 320:486-488.
- 876 Tarailo-Graovac M, Chen N. 2009. Using RepeatMasker to identify repetitive elements in genomic  
877 sequences. *Curr Protoc Bioinformatics.* 25:4.10. 11-14.10. 14.
- 878 Tőkési N, Lehotzky A, Horváth I, Szabó B, Oláh J, Lau P, Ovádi J. 2010. TPPP/p25 promotes  
879 tubulin acetylation by inhibiting histone deacetylase 6. *J Biol Chem.* 285:17896-17906.
- 880 Toxopeus J, Košťál V, Sinclair BJ. 2019. Evidence for non-colligative function of small

- 881 cryoprotectants in a freeze-tolerant insect. *P Roy Soc B-Biol Sci.* 286:20190050.
- 882 Toxopeus J, Sinclair BJ. 2018. Mechanisms underlying insect freeze tolerance. *Biol Rev.* 93:1891-  
883 1914.
- 884 Tsuji Y, Ayaki H, Whitman SP, Morrow CS, Torti SV, Torti FM. 2000. Coordinate transcriptional  
885 and translational regulation of ferritin in response to oxidative stress. *Mol Cell Biol.* 20:5818-  
886 5827.
- 887 Tummala H, Dokal AD, Walne A, Ellison A, Cardoso S, Amirthasigamanipillai S, Kirwan M,  
888 Browne I, Sidhu JK, Rajeeve V, et al. 2018. Genome instability is a consequence of  
889 transcription deficiency in patients with bone marrow failure harboring biallelic ERCC6L2  
890 variants. *P Nati Acad Sci USA.* 115:7777-7782.
- 891 Umbreit NT, Gestaut DR, Tien JF, Vollmar BS, Gonen T, Asbury CL, Davis TN. 2012. The Ndc80  
892 kinetochore complex directly modulates microtubule dynamics. *P Nati Acad Sci USA.*  
893 109:16113-16118.
- 894 Verkman A, Mitra AK. 2000. Structure and function of aquaporin water channels. *Am J Physiol-  
895 Renal.* 278:F13-F28.
- 896 Walker BJ, Abeel T, Shea T, Priest M, Abouelliel A, Sakthikumar S, Cuomo CA, Zeng Q, Wortman  
897 J, Young SK, et al. 2014. Pilon: an integrated tool for comprehensive microbial variant  
898 detection and genome assembly improvement. *PLoS One.* 9:e112963.
- 899 Wang L, Paudyal SC, Kang Y, Owa M, Liang F-X, Spektor A, Knaut H, Sánchez I, Dynlacht BD.  
900 2022. Regulators of tubulin polyglutamylation control nuclear shape and cilium disassembly  
901 by balancing microtubule and actin assembly. *Cell Res.* 32:190-209.
- 902 Wu BS, Feng CG, Zhu CL, Xu WJ, Yuan Y, Hu ML, Yuan K, Li YX, Ren YD, Zhou Y, et al. 2021.  
903 The genomes of two billfishes provide insights into the evolution of endothermy in teleosts.  
904 *Mol Biol Evol.* 38:2413-2427.
- 905 Wu F, Yang F, Vinnakota KC, Beard DA. 2007. Computer modeling of mitochondrial tricarboxylic  
906 acid cycle, oxidative phosphorylation, metabolite transport, and electrophysiology. *J Biol  
907 Chem.* 282:24525-24537.
- 908 Wu TD, Watanabe CK. 2005. GMAP: a genomic mapping and alignment program for mRNA and  
909 EST sequences. *Bioinformatics.* 21:1859-1875.
- 910 Wu X, Lu C, Dong X, Zhang Z, Yang M, Xu H. 2017. Proteomics analysis of zebrafish brain  
911 following chronically exposed to bisphenol A. *Toxicol Environ Chem.* 99:469-481.
- 912 Xiao Y, Dai Y, Li L, Geng F, Xu Y, Wang J, Wang S, Zhao J. 2021. Tetrahydrocurcumin ameliorates  
913 Alzheimer's pathological phenotypes by inhibition of microglial cell cycle arrest and apoptosis  
914 via Ras/ERK signaling. *Biomed Pharmacother.* 139:111651.
- 915 Xu W, Yin W, Chen A, Li J, Lei G, Fu C. 2014. Phylogeographical analysis of a cold-temperate  
916 freshwater fish, the Amur sleeper (*Perccottus glenii*) in the Amur and Liaohe River Basins of  
917 northeast Asia. *Zool Sci* 31:671-679.
- 918 Xu Z, Wang H. 2007. LTR\_FINDER: an efficient tool for the prediction of full-length LTR  
919 retrotransposons. *Nucleic Acids Res.* 35:W265-W268.
- 920 Yang Z. 2007. PAML 4: phylogenetic analysis by maximum likelihood. *Mol Biol Evol.* 24:1586-  
921 1591.
- 922 Zhang G, Storey JM, Storey KB. 2011. Chaperone proteins and winter survival by a freeze tolerant  
923 insect. *J Insect Physiol.* 57:1115-1122.
- 924 Zhang J, Gupta A, Storey KB. 2021. Freezing stress adaptations: critical elements to activate Nrf2

- 925 related antioxidant defense in liver and skeletal muscle of the freeze tolerant wood frogs. *Com*  
926 *Biochem Phys B*. 254:110573.
- 927 Zhang J, Storey KB. 2012. Cell cycle regulation in the freeze tolerant wood frog, *Rana sylvatica*.  
928 *Cell Cycle*. 11:1727-1742.
- 929 Zhang X, Zhuang R, Ye Q, Zhuo J, Chen K, Lu D, Wei X, Xie H, Xu X, Zheng S. 2019. High  
930 expression of human AugminComplex submit 3 indicates poor prognosis and associates with  
931 tumor progression in hepatocellular carcinoma. *J Cancer*. 10:1434.



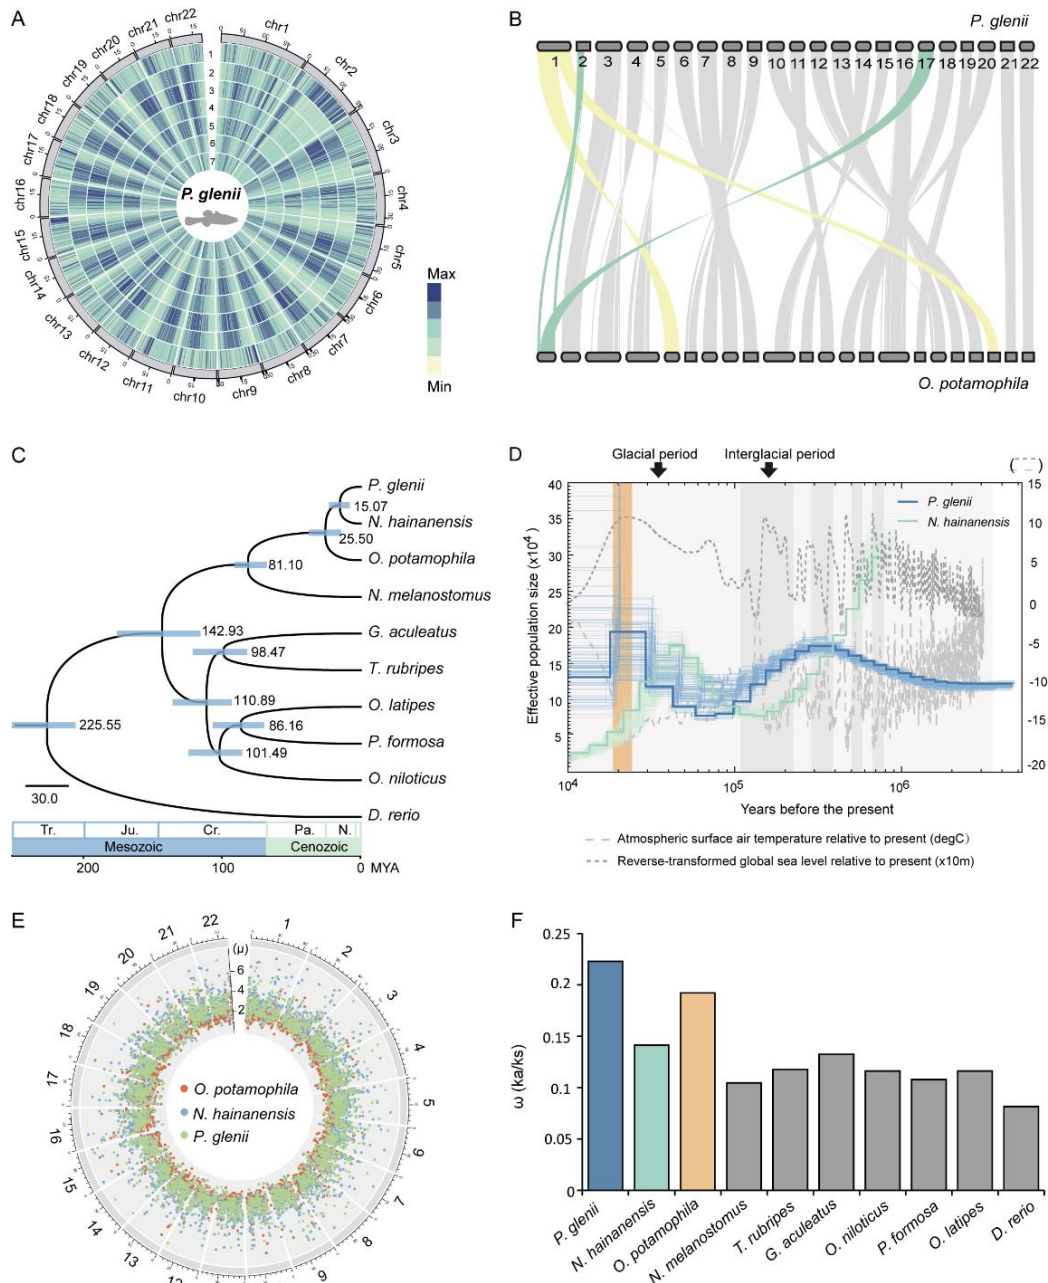

1

2

3 **Fig. 1.** Evolutionary history of the Amur sleeper. (A) Circos plots showing the distributions of the

4 genomic components in *P. glenii* with 500,000 bp windows. 1: Gene frequency, 2: Density of LINES,

5 3: Density of LTRs, 4: Density of DNA, 5: Density of TRFs, 6: Density of SINES, 7: Density of GC

6 content. (B) Collinearity analysis of the *P. glenii* and *O. potamophila* genomes. (C) Phylogenetic

7 tree and divergence times estimated for the Amur sleeper and nine other teleosts. Numbers near each

8 node are the estimated divergence times, with the blue error bars indicating the 95% confidence

9 levels. (D) Demographic history estimated by PSMC. Blue lines represent *P. glenii*, and green lines

10 represent *N. hainanensis*. Orange frame represents the last glacial maximum (LGM). (E) Mutation

11 rates for three species estimated across the genome. Number around the outside represent the

12 chromosome ID for the *O. potamophila* genome.  $\mu$  represents the mutation rate ( $\times 10^{-9}$  per site per

13 year) of each window. (F) The  $\omega(Ka/Ks)$  ratios of concatenated genes in ten species.

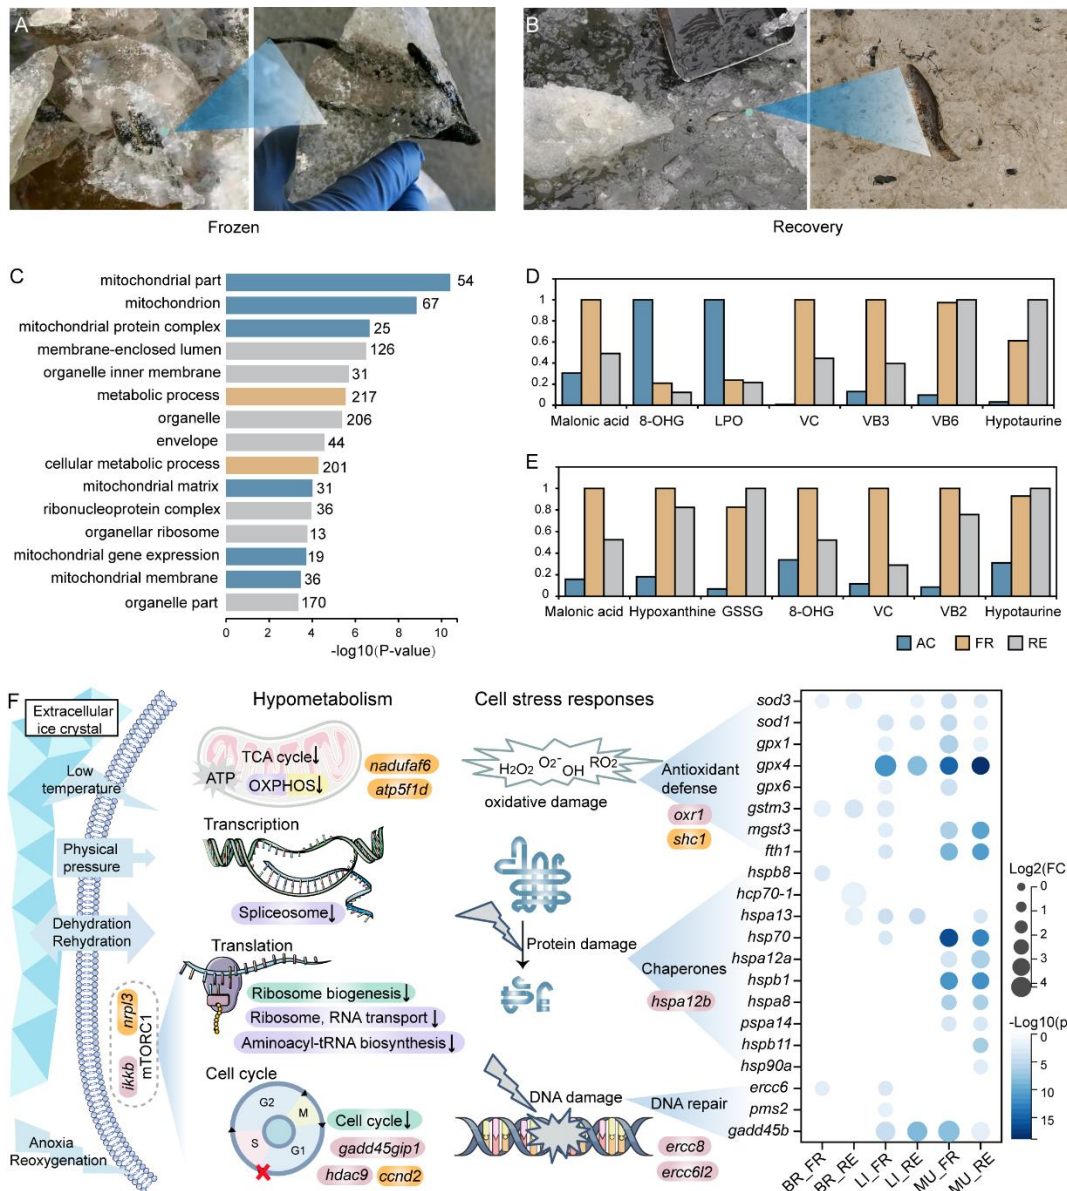

**Fig. 2. Genes and metabolites related to hypometabolism and cell stress response.** (A and B) Illustrations of Amur sleeper during FR (A) and RE (B). (C) Top 15 significantly enriched GO terms for down-regulated genes in all three tissues at FR are shown. (D and E) Changes of metabolites related to metabolic inhibition and antioxidant defense in the liver (D) and muscle tissue (E). The relative levels of the metabolites are represented as bar graphs. Height of the column with the largest quantity is set as 100%, and that for the smaller quantities shown proportionally. (F) Pathways and genes associated with hypometabolism and cell stress responses. The significantly enriched pathways related to energy-expensive cell processes of down-regulated genes in brain (purple), liver (green), and muscle (yellow) tissues were shown. Genes are labeled with different colors to indicate positively selected genes (orange) and rapidly evolved genes (pink). The heatmap showed the transcriptional log2 (fold change) in expression of differently expressed genes in FR and RE relative to that in AC (BR: brain, LI: liver, MU: muscle, FC: fold change).

14  
15  
16  
17  
18  
19  
20  
21  
22  
23  
24  
25  
26  
27  
28  
29

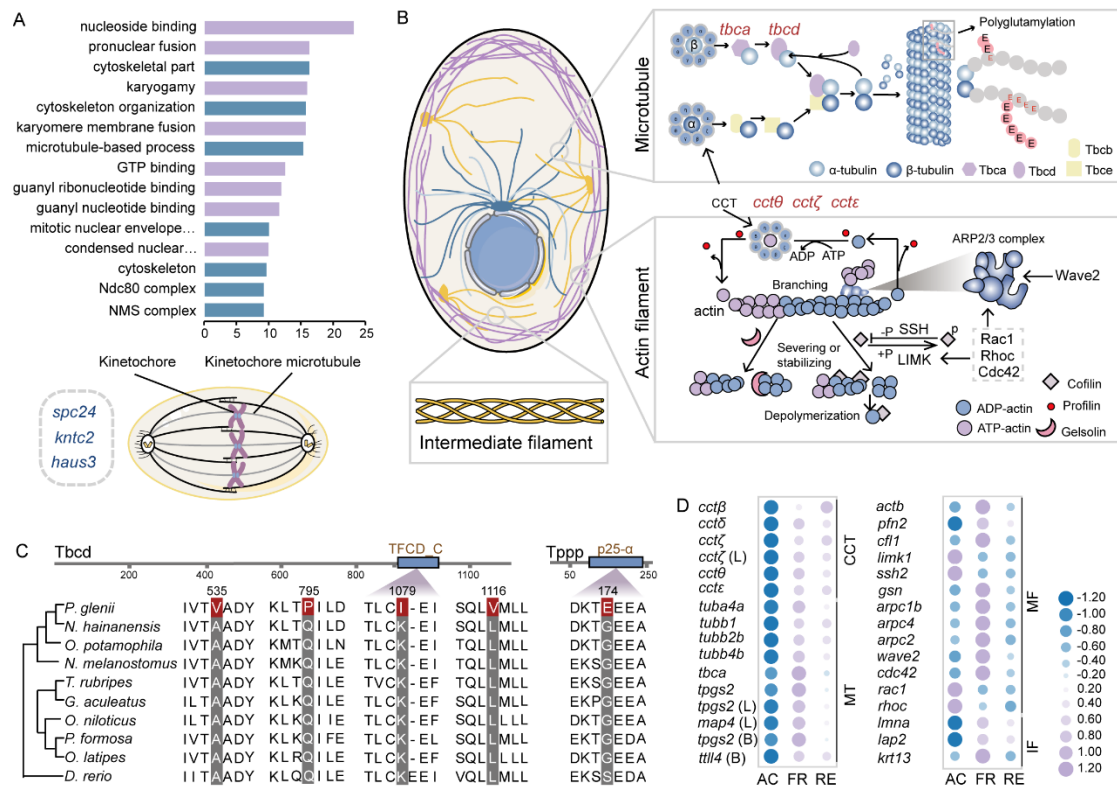

30

31

32 **Fig. 3. Changes in genes correlated with the cytoskeleton.** (A) The top 15 significantly enriched  
 33 GO terms for expanded gene families (up), and three expanded gene (down) that play crucial roles  
 34 in mitosis (down) were shown. Blue columns represent cytoskeleton-related GO terms. (B)  
 35 Schematic illustration of cytoskeletal composition, microtubule assembly, and regulation of actin  
 36 cytoskeleton. Rapidly evolving genes are marked in red. (C) Sequence alignments for the positively  
 37 selected genes, *tbcd* and *tppp*. Sites marked with red rectangles are positively selected sites. (D)  
 38 Expression changes for genes related to the cytoskeleton. Purple represents higher expression levels,  
 39 and blue represents lower expression levels. L and B represent liver and brain tissue, respectively  
 40 (CCT: CCT complex; MT: microtubule; MF: actin filament; IF: intermediate filament).

41

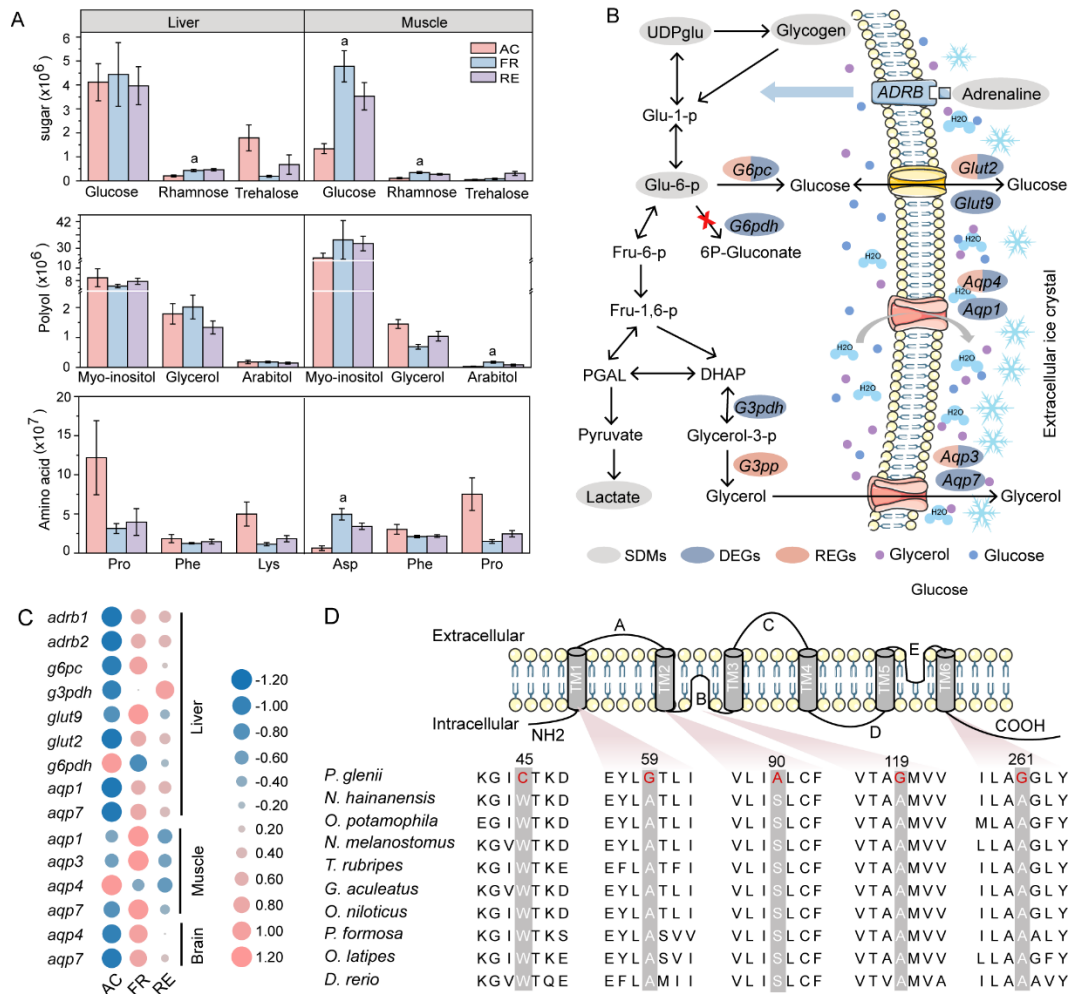

**Fig. 4. Putative cryoprotectants and their movement with water.** (A) The top three metabolism with the highest content in sugar, polyhydric alcohols (polyol), and amino acid, respectively. The letter a indicates that the content increases significantly during FR stage. Error bars represent the mean  $\pm$  S.D. (n = 6). (B) Schematic depiction of biosynthetic pathways for glucose and glycerol, and movement of water and cryoprotectants. (C) Expression changes of genes related to cryoprotectant. Pink represents higher expression levels, and blue represents lower expression levels. (D) Multiple-sequence alignments of *aqp4* amino acid sequences of Amur sleeper and other nine teleosts, and the specific mutations are marked in red.

42  
43  
44  
45  
46  
47  
48  
49  
50  
51  
52  
53  
54  
55  
56  
57  
58  
59  
60  
61

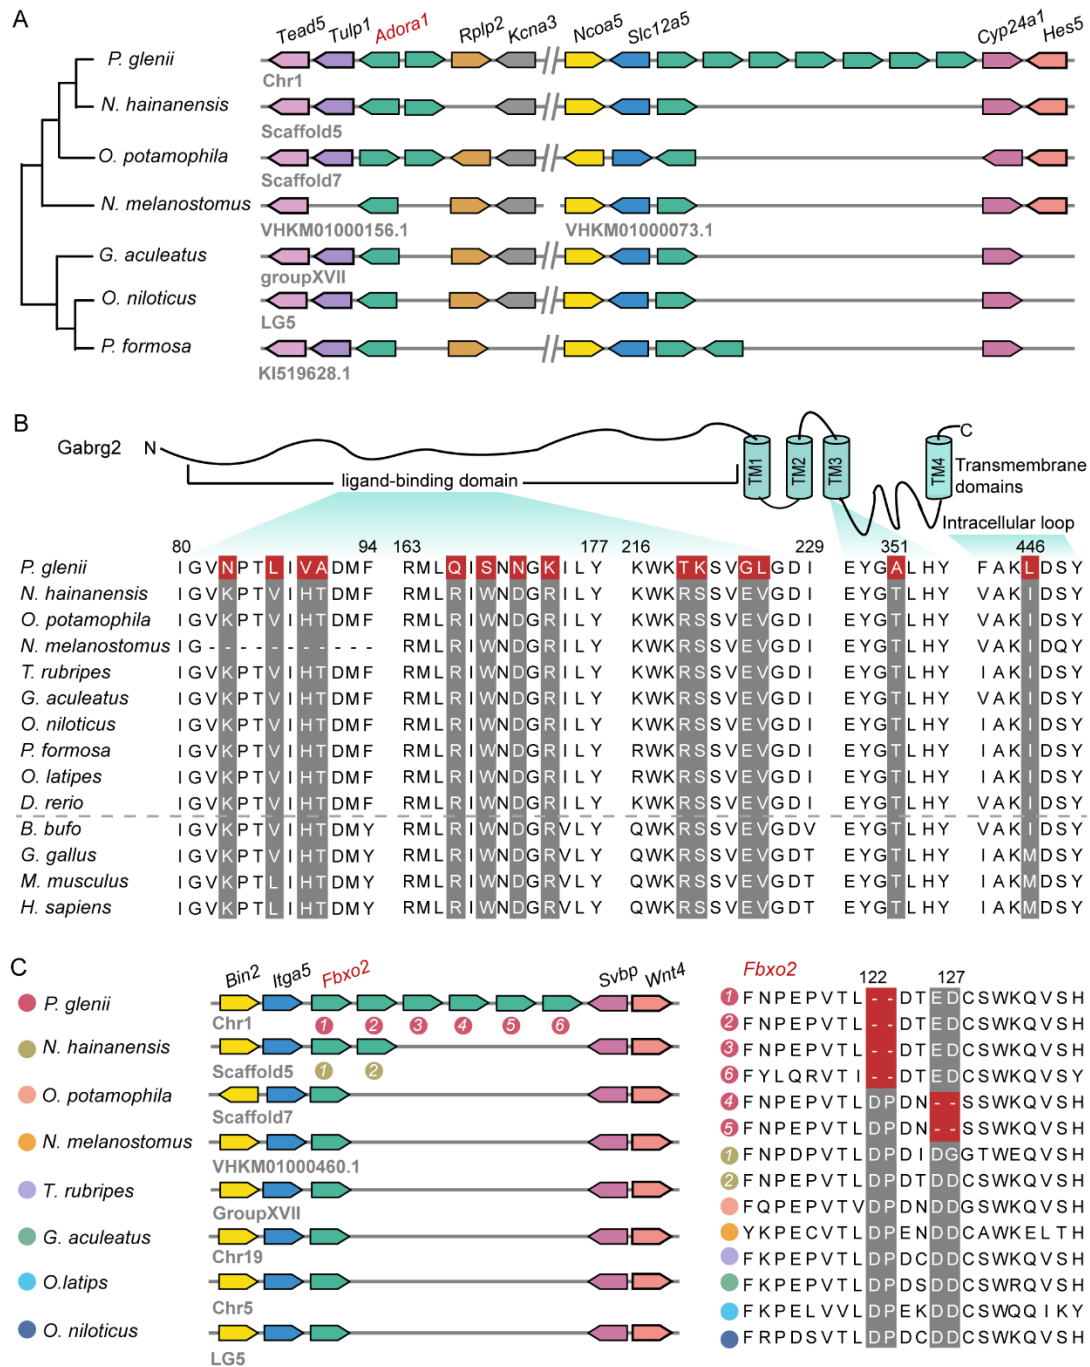

62

63

64 **Fig. 5. Expanded and positively selected genes related to nerve activity.** (A) Expansion of the  
 65 adenosine A1-receptor (*adora*) gene family. Seven copies of the Amur sleeper *adora* gene are  
 66 arranged in tandem. (B) Schematic representation of *gabrg2* protein, and the sequence alignment of  
 67 Amur sleeper *gabrg2* with nine teleosts and four other vertebrates (*B. bufo*: frog, *G. gallus*: chicken,  
 68 *M. musculus*: mouse, *H. sapiens*: human). 14 positively selected sites in Amur sleeper are boxed in  
 69 red. (C) F-box only protein 2 (*fbxo2*) in the Amur sleeper is tandemly duplicated (left). Alignment  
 70 of six copies of *fbxo2* in Amur sleeper with other teleosts show specific deletions of 2-amino acid  
 71 (right).

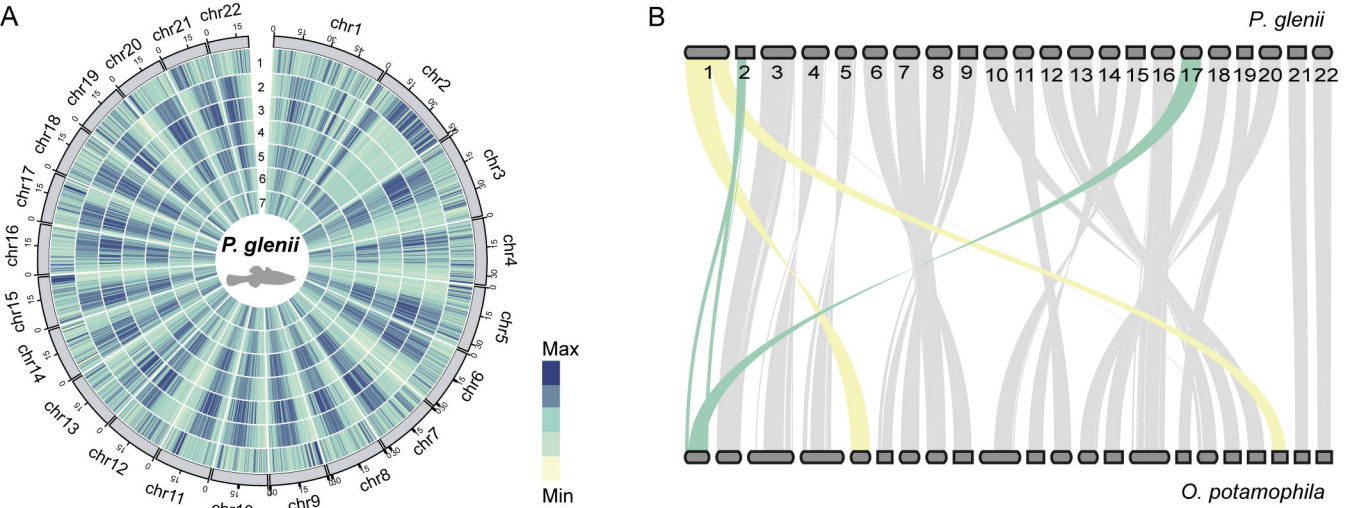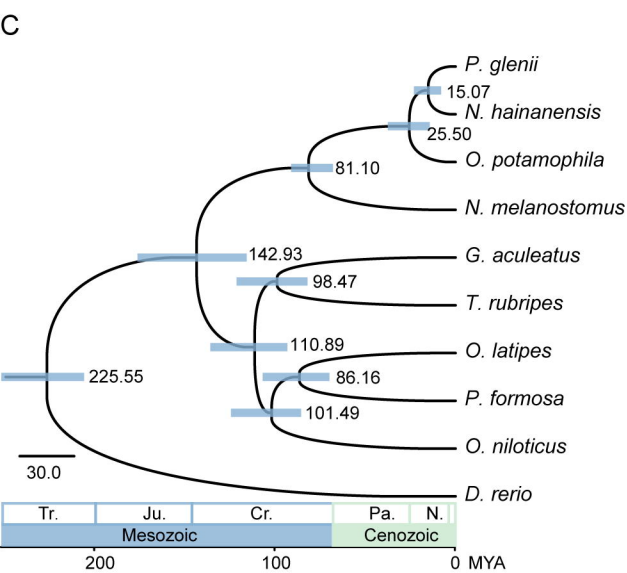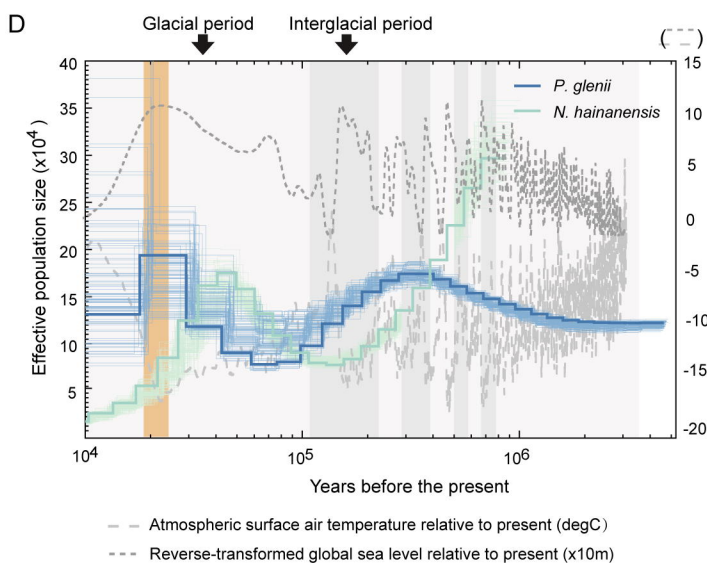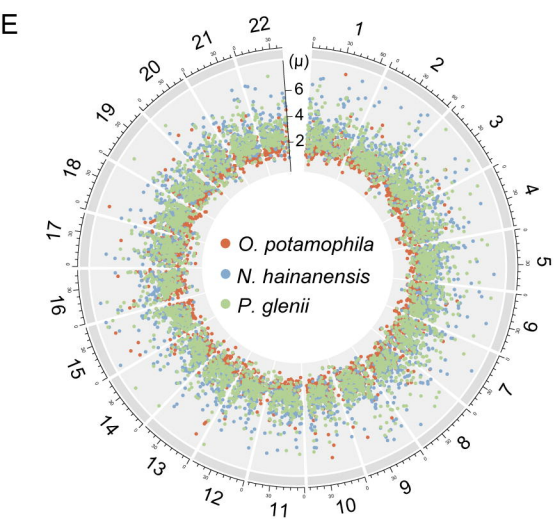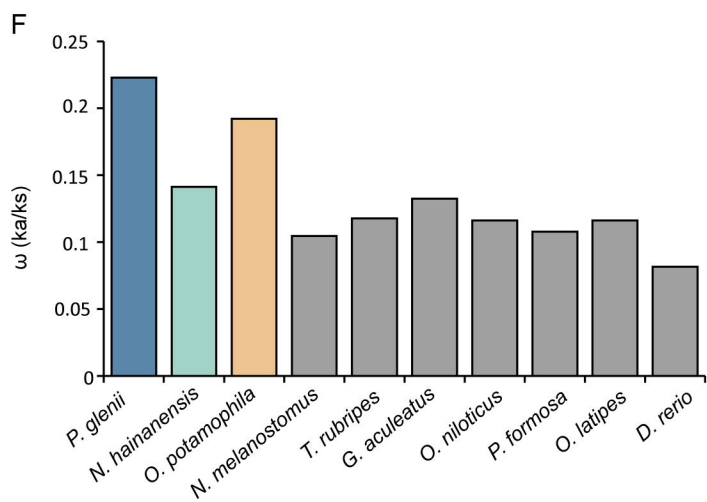

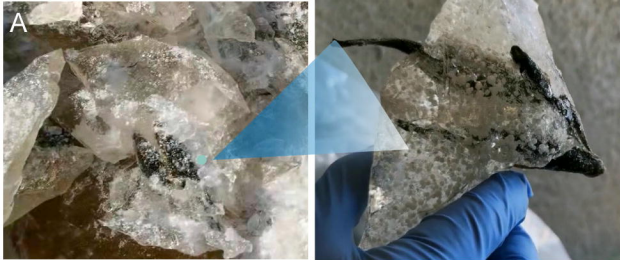

Frozen

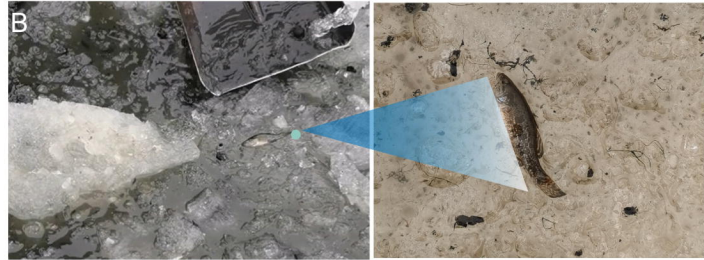

Recovery

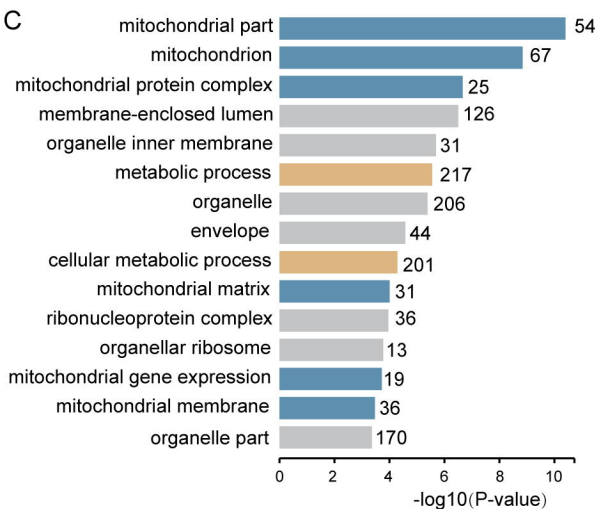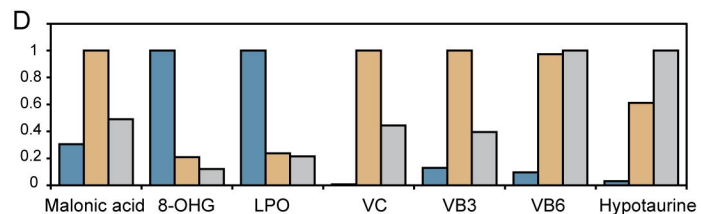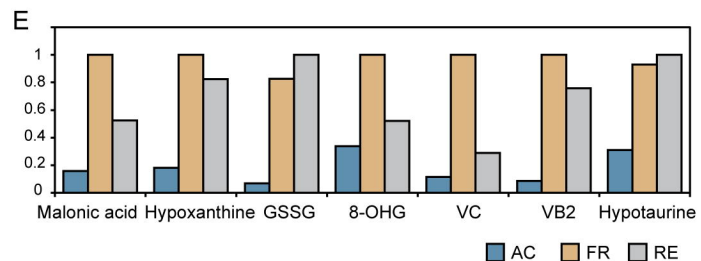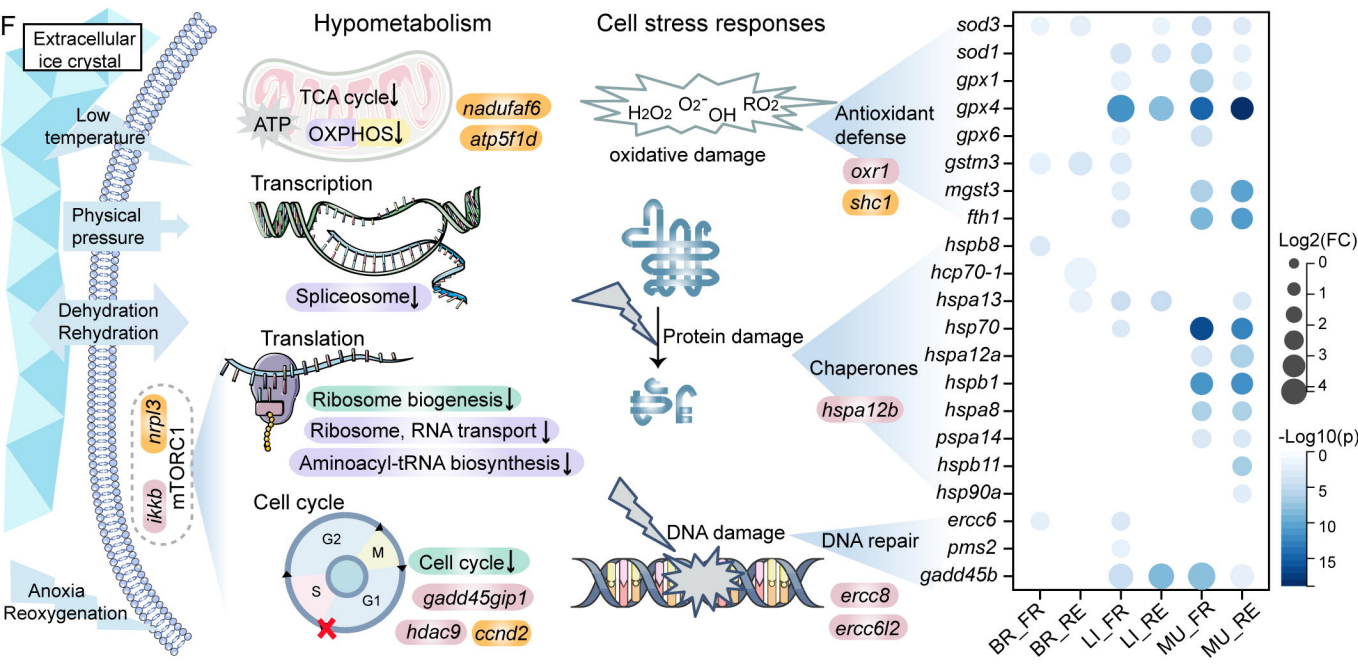

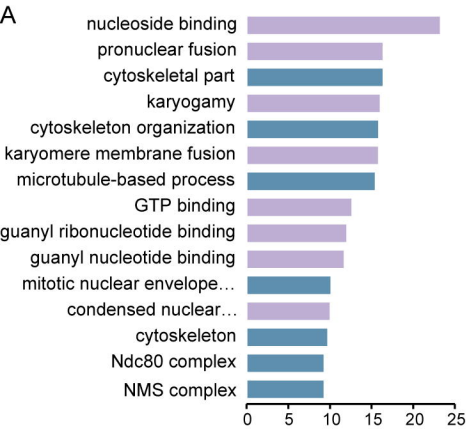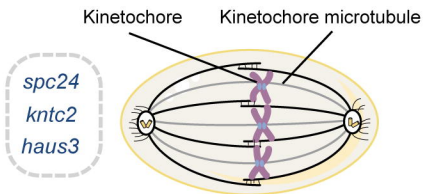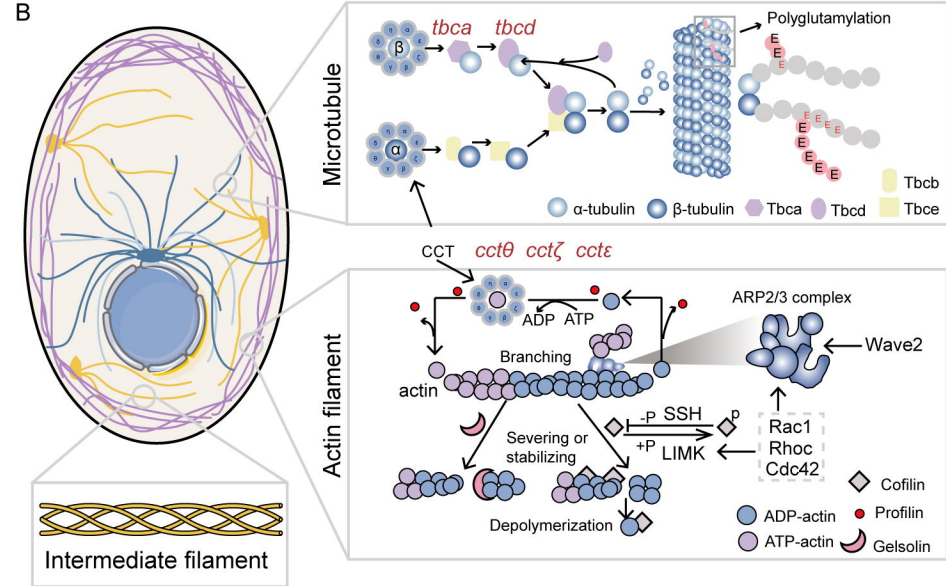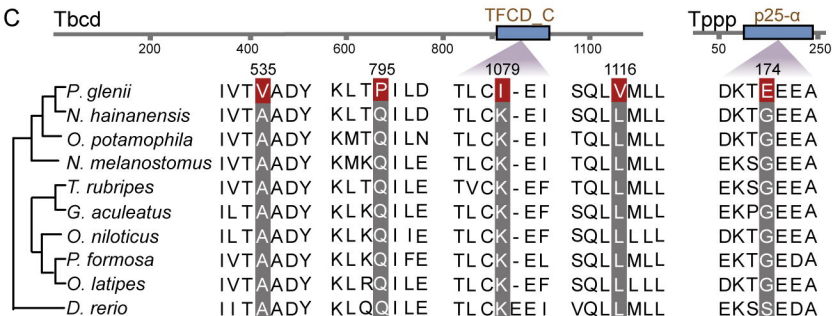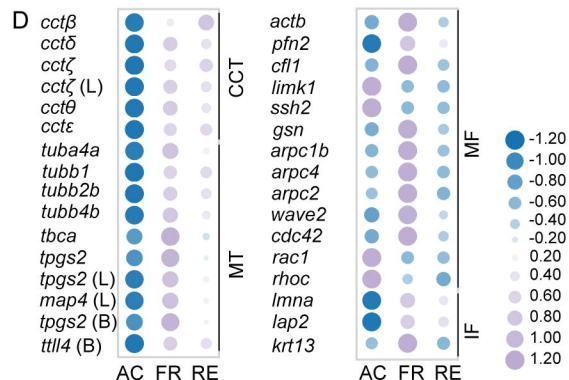



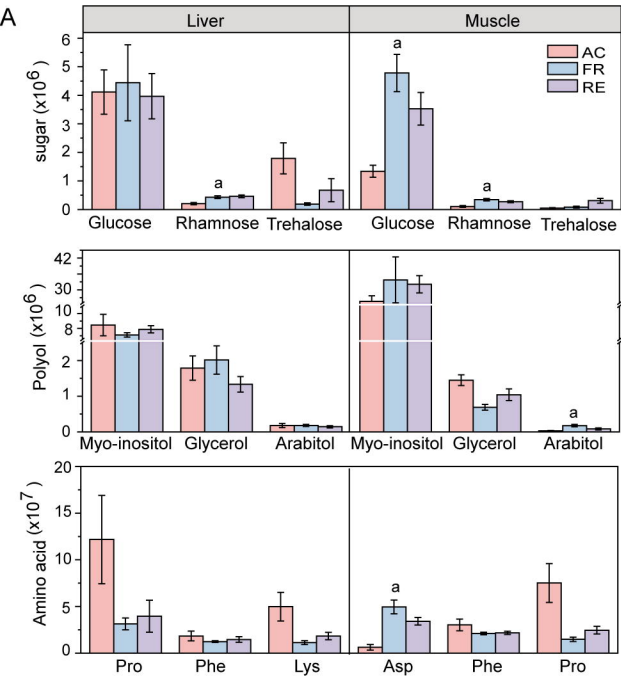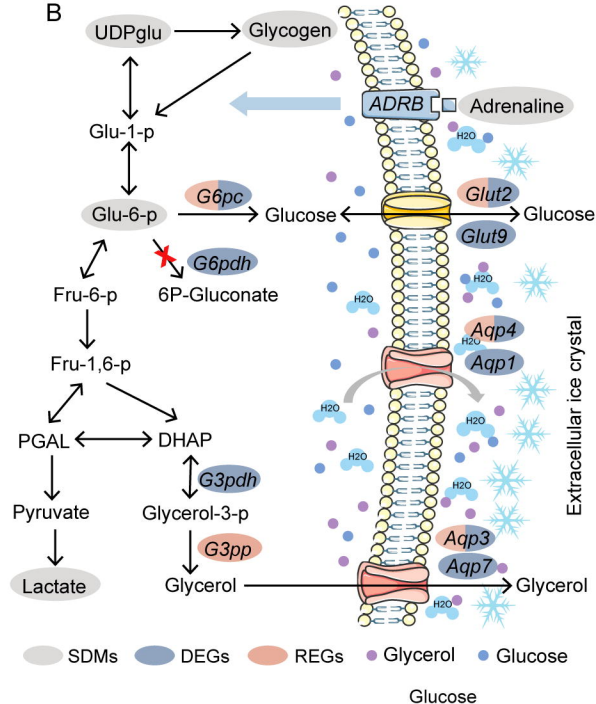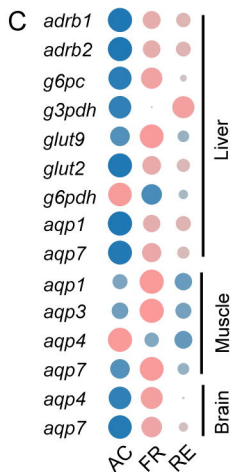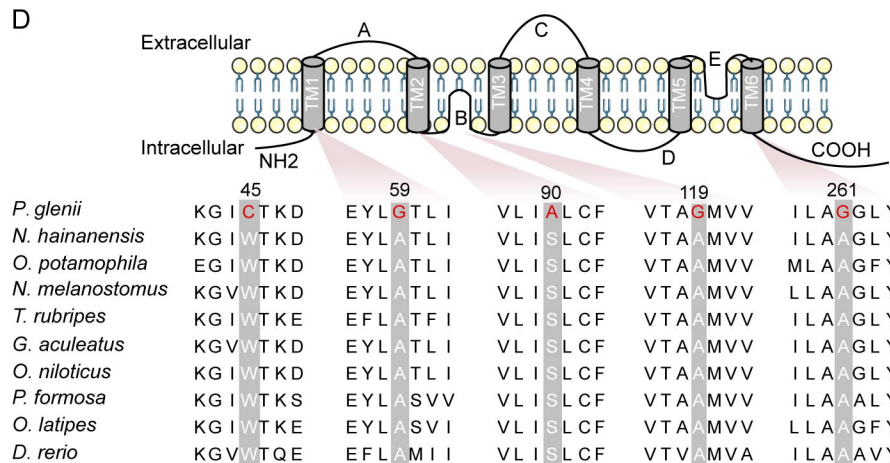

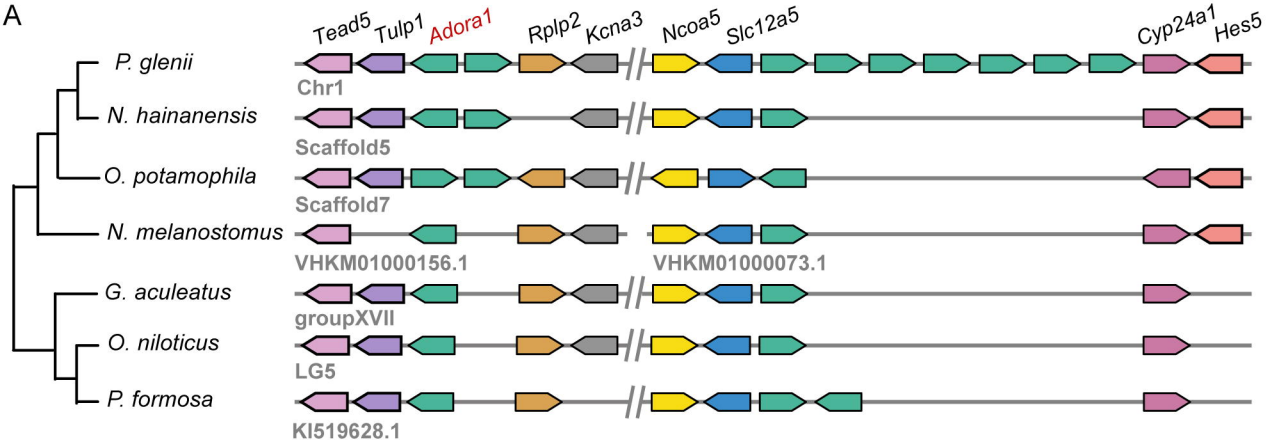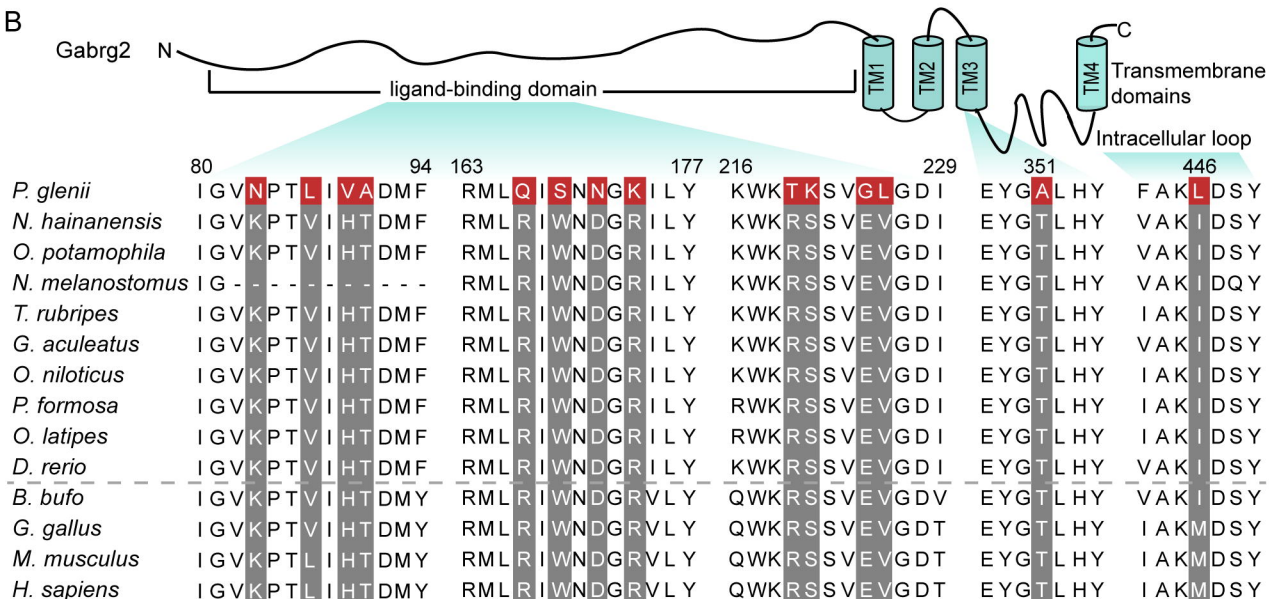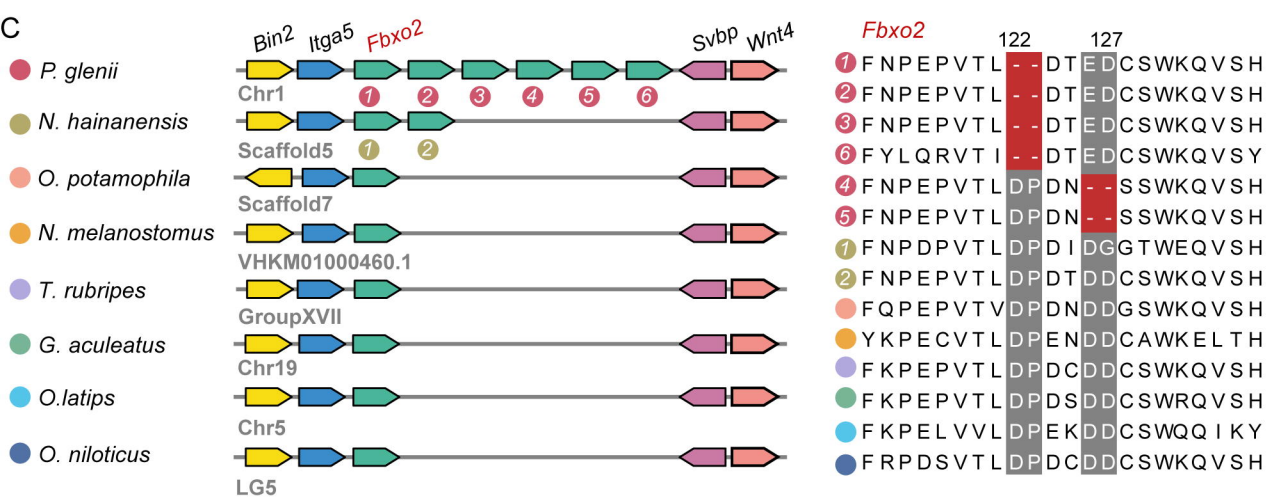

Source: https://www.biorxiv.org/content/10.1101/2022.05.10.491133v1.full.pdf
